1     **Towards a molecular mechanism underlying mitochondrial protein import through the**  
2                                   **TOM and TIM23 complexes**

3     Holly C. Ford, William J. Allen, Gonçalo C. Pereira\*, Xia Liu, Mark S. Dillingham and Ian  
4                                   Collinson†

5                                   *School of Biochemistry, University of Bristol, Bristol BS8 1TD, UK*

6  
7     †, corresponding author: [ian.collinson@bristol.ac.uk](mailto:ian.collinson@bristol.ac.uk)

8     \*, present address: *MRC - Mitochondrial Biology Unit, University of Cambridge, The Keith*  
9     *Peters Building, Cambridge Biomedical Campus, Cambridge CB2 0XY, UK*

10    **ABSTRACT**

11    Nearly all mitochondrial proteins need to be targeted for import from the cytosol. For the majority,  
12    the first port of call is the translocase of the outer membrane (TOM complex), followed by a  
13    procession of alternative molecular machines, conducting transport to their final destination. The  
14    pre-sequence translocase of the inner-membrane (TIM23-complex) imports proteins with  
15    cleavable pre-sequences, and comes in two flavours: the TIM23<sup>SORT</sup> complex mediates inner  
16    mitochondrial membrane (IMM) protein insertion and the TIM23<sup>MOTOR</sup> complex delivers proteins  
17    to the matrix. Progress in understanding these transport mechanisms has been hampered by the  
18    poor sensitivity and time-resolution of import assays. However, with the development of an assay  
19    based on split NanoLuc luciferase, we can now explore this process in greater detail. Here, we  
20    apply this new methodology to understand how  $\Delta\psi$  and ATP hydrolysis, the two main driving  
21    forces for import through the TIM23<sup>MOTOR</sup> complex, contribute to the import of pre-sequence-  
22    containing precursors (PCPs) with varying properties. Notably, we found that two major rate-  
23    limiting steps define PCP import time: passage of PCP across the OMM and initiation of IMM  
24    transport by the pre-sequence. The rates of these steps are influenced by PCP properties such as  
25    size and net charge, but not total amount of PCP imported – emphasising the importance of  
26    collecting rapid kinetic data, achieved here, to elucidate mechanistic detail. The apparent  
27    distinction between transport through the two membranes (passage through TOM is substantially  
28    complete before PCP-TIM engagement) is in contrast with the current view that import occurs  
29    through TOM and TIM in a single continuous step. Our results also indicate that PCPs spend very  
30    little time in the TIM23 channel – presumably rapid success or failure of import is critical for  
31    maintaining mitochondrial fitness.

## 1 INTRODUCTION

2 Mitochondria are double membrane-bound eukaryotic organelles responsible for the biosynthesis  
3 of ATP among many other essential cellular functions (Nowinski et al., 2018)(Rouault,  
4 2012)(Nicholls, 1978)(Chen et al., 2003)(Nishikawa et al., 2000)(Hoth et al., 1997)(Chandel,  
5 2015)(Wang and Youle, 2009). Of more than a thousand proteins that constitute the mitochondrial  
6 proteome, all but a handful (encoded on the mitochondrial genome – 13 in human) are synthesised  
7 in the cytosol, and must be imported. Almost all mitochondrial proteins (exceptions include  
8 precursors of  $\alpha$ -helical outer mitochondrial membrane (OMM) proteins) initially enter  
9 mitochondria *via* the translocase of the outer membrane (TOM complex) which contains the pore-  
10 forming  $\beta$ -barrel protein, Tom40 (Ahting et al., 2001)(Guan et al., 2021)(Araiso et al., 2019). From  
11 here they are sorted to a number of bespoke protein import machineries, which direct them to their  
12 final sub-mitochondrial destination: the OMM, inter-membrane space (IMS), inner-membrane  
13 (IMM), or matrix.

14  
15 Roughly 60-70% of mitochondrial precursor proteins – almost all those targeted to the matrix and  
16 a subset of IMM proteins – have a positively-charged, amphipathic  $\alpha$ -helical pre-sequence, also  
17 known as a mitochondrial targeting sequence (MTS) (Araiso et al., 2019)(Vögtle et al., 2009).  
18 These pre-sequence-containing precursors (PCPs) are transferred to the translocase of the inner  
19 membrane (TIM23-complex) once their N-termini emerge from the Tom40 channel, and pass  
20 through in an unfolded state (Eilers and Schatz, 1986)(Matouschek et al., 1997)(Neupert and  
21 Brunner, 2002)(Rassow et al., 1990) (Neupert and Herrmann, 2007). Genetic and biochemical  
22 experiments have elucidated the key constituents of the TIM23-complex (Blom et al., 1993)  
23 (Maarse et al., 1992) (Emtage and Jensen, 1993) (Maarse et al., 1994): the core (TIM23<sup>CORE</sup>)  
24 comprises three membrane-spanning proteins: Tim23, Tim17 and Tim50, which associates with  
25 different proteins to form complexes tailored for different tasks. Together with Tim21 and Mgr2  
26 it forms the TIM23<sup>SORT</sup> complex, capable of lateral release of proteins with hydrophobic sorting  
27 sequences. While association with the pre-sequence translocase-associated motor (PAM) forms  
28 the TIM23<sup>MOTOR</sup> complex, responsible for matrix import.

29  
30 Our current understanding of protein import *via* the TOM-TIM23<sup>MOTOR</sup> complex is summarised in  
31 **Figure 1A**. After entry of the PCP through TOM, the electrical component of the proton-motive

1 force (PMF) across the IMM – the membrane potential ( $\Delta\psi$ ; negative in the matrix) – is required,  
2 acting as an electrophoretic force on the positively charged pre-sequence (Martin et al.,  
3 1991)(Geissler et al., 2000)(Truscott et al., 2001).  $\Delta\psi$  alone is sufficient for insertion of membrane  
4 proteins *via* the TIM23<sup>SORT</sup> complex (Callegari et al., 2020), but complete import into the matrix  
5 by the TIM23<sup>MOTOR</sup> complex requires an additional driving force: ATP hydrolysis by the main  
6 component of PAM, the mtHsp70 protein (Ssc1 in yeast)(Wachter et al., 1994), which pulls the  
7 rest of the PCP through to the matrix after the MTS has been imported. Finally, after crossing the  
8 IMM either way the MTS is cleaved by a matrix processing peptidase (MPP) (Vögtle et al., 2009).

9  
10 The above model is primarily derived from end point measurements from a classical import assay  
11 involving autoradiography or Western blotting. However, this method is limited in its time  
12 resolution, and insufficient to provide a deep understanding of the individual steps that make up  
13 import, or their relative contributions to its kinetics. For this reason, we recently developed a highly  
14 time-resolved and sensitive assay which exploits a split NanoLuc enzyme (Pereira et al.,  
15 2019)(Dixon et al., 2015) to measure protein transport across membranes (Figure 1B). In the  
16 NanoLuc assay, PCPs tagged with a small fragment of the NanoLuc enzyme (an 11 amino acid  
17 peptide called pep86), are added to mitochondria isolated from yeast engineered to contain a  
18 matrix-localised large fragment of the enzyme (the enzyme lacking a single  $\beta$ -strand, called 11S).  
19 When the PCP-pep86 fusion protein reaches the matrix, pep86 binds rapidly and with tight affinity  
20 to 11S forming a complete NanoLuc luciferase. In the presence of the NanoLuc substrate  
21 (furimazine), this generates a luminescence signal proportional to the amount of NanoLuc formed.  
22 Luminescence is thus a direct readout of the amount of pep86 (and hence PCP) that has entered  
23 the matrix, up to the total amount of 11S. As expected, it is  $\Delta\psi$ -dependent, affected by depletion  
24 of ATP, and sensitive to specific inhibitors of TIM23-dependent protein import (Pereira et al.,  
25 2019).

26  
27 Here, we continue the use of the NanoLuc translocation assay to obtain precise, time-resolved  
28 measurements of protein delivery into the matrix mediated by the TOM and TIM23<sup>MOTOR</sup>  
29 complexes. To add mechanistic detail to the above model (Figure 1A), we systematically varied  
30 the length and charge of the mature sequences of PCPs and profiled their import kinetics. To better  
31 understand the cause of any effects on the observable kinetic parameters (amplitude, rate and lag),

1 we performed experiments under conditions where either of the two main driving forces,  $\Delta\psi$  or  
2 ATP, had been depleted.

3  
4 Our results suggest that IMM transport itself is fast in normally functioning mitochondria, and  
5 limited by the availability of  $\Delta\psi$ . The rate of import is instead limited by transport across the  
6 OMM, which is strongly dependent on protein size, and initiation of transport across the IMM by  
7 the MTS. Analyses such as these, together with emerging structures of the import machinery eg.  
8 (Tucker and Park, 2019), will be fundamental to understanding the underlying molecular basis of  
9 mitochondrial protein import.

10

11

## 12 RESULTS

### 13 **The import reaction is largely single turnover under the experimental conditions deployed**

14 An exemplar NanoLuc import trace is shown in [Figure 1C](#), collected using the model yeast matrix  
15 protein Acp1 (also used in previous import studies as a matrix-targeted precursor (Wurm and  
16 Jakobs, 2006)) fused to a pep86 (Acp1-pep86). The most intuitive parameter of this trace is  
17 amplitude (see below for full fitting details), which corresponds to the amount of NanoLuc formed  
18 when the reaction reaches completion, and thus the total number of import events; so long as the  
19 pep86 tag does not exceed matrix 11S. In order to verify that this was not the case we estimated  
20 the concentration of 11S in the mitochondria by quantitative Western blotting. An antibody raised  
21 against intact NanoLuc, capable of detecting 11S, was used to compare the quantities of  
22 mitochondrial 11S with known quantities of the purified protein ([Figure 1 – figure supplement  
23 1A](#)). The results reveal high ( $\mu\text{M}$ ) internal 11S concentrations with some variation between  
24 mitochondrial preparations ( $\sim 2.8 - 7.5 \mu\text{M}$ ). We see no correlation between the amount of 11S and  
25 signal amplitude even with saturating PCP ([Figure 1 – figure supplement 1B-C](#), and see below).  
26 Thus, we can conclude that the matrix concentration of 11S is in excess over the imported PCP,  
27 and not limiting the reaction, irrespective of how much is added to the outside.

28

29 We next measured signal amplitude over a wide range of concentrations of Acp1-pep86. Plotting  
30 the results shows that amplitude is linearly related to PCP concentration from 753 fM up to  $\sim 45$   
31 nM, where it plateaus ([Figure 1D](#)). Because the mitochondrial matrix volume is only  $\sim 1/12,000$  of

1 the total reaction volume (see Methods), if all 45 nM PCP were imported it would correspond to  
2 roughly 540  $\mu$ M inside the matrix. This is not only far in excess of the internal 11S concentration  
3 (as low as  $\sim$ 2.8  $\mu$ M), but is also implausible simply from the amount of physical space available.  
4 Evidently then, only a tiny fraction of the PCP added reaches the matrix.

5  
6 As neither the amount of PCP added, nor the amount of 11S in the matrix, appear to be limiting,  
7 we next tested to see whether the number of import sites might be having an effect. To estimate  
8 the number of import sites, we generated a PCP that can enter and give a signal, but which prevents  
9 subsequent import events through the same import site – *i.e.* forcing single turnover conditions.  
10 To do this, we fused dihydrofolate reductase (DHFR) to a model PCP; in the presence of the  
11 inhibitor methotrexate (MTX) DHFR folds tightly and cannot be imported (Pfanner et al.,  
12 1987)(Gold et al., 2017).

13  
14 As expected, if DHFR is omitted (PCP-pep86) MTX has no effect (Figure 2A, grey bars), while if  
15 it is positioned N-terminal to pep86 (PCP-DHFR-pep86) we see very little luminescence with  
16 MTX present, consistent with blocked import (Figure 2A, purple bars). However, when DHFR is  
17 positioned C-terminal to pep86 (PCP-pep86-DHFR) with sufficient length between the two to span  
18 the TOM and TIM complexes (212 amino acids in this case, longer than the 135 required (Rassow  
19 et al., 1989)), we do see an import signal (Figure 2A, orange bars). This confirms that NanoLuc  
20 can form as soon as pep86 enters the matrix and does not require the entire PCP to be imported,  
21 as seen previously with the bacterial Sec system (Allen et al., 2020).

22  
23 Importantly, the presence or absence of MTX makes only a minor difference to the amplitude of  
24 this signal (Figure 2A). Indeed, the signal amplitude as a function of the [PCP-pep86-DHFR] is  
25 similar in the presence or absence of MTX (Figure 2B). The slope, which corresponds to the  
26 increase in amplitude per 1 nM PCP-pep86-DHFR, is 1.22 times greater in the absence of MTX,  
27 meaning only about 20% of the signal arises from turnovers beyond the first. Of course this does  
28 not mean that import is strictly single turnover – which would certainly seem implausible for fully  
29 functional mitochondria in their native environment – it does suggest that it behaves as single  
30 turnover under the conditions here using isolated mitochondria (without the cytosol).

31

1 It has previously been shown that signal amplitude can be reduced by depleting  $\Delta\psi$  (Pereira et al.,  
2 2019), which would suggest that available energy limits protein import. This can be reconciled  
3 with the apparent single turnover nature of the reaction if 'resetting' the channel after import –  
4 possibly through dimerisation of TIM23, as previously reported (Bauer et al., 1996) – requires  
5 additional energy input.

6

### 7 **Kinetic analysis of import suggests two major rate-limiting steps**

8 In addition to the amplitude data, the import traces contain information about the kinetics of the  
9 reaction. Looking again at the data in [Figure 1C](#), it can be seen that import does not start at its  
10 maximum rate; rather there is a lag before import accelerates. This is characteristic of reactions  
11 with multiple consecutive steps, where only the last one gives rise to a signal. As an approximation,  
12 the data fitted well to an equation for a two-step process where the second gives rise to the signal  
13 ( $A \rightarrow B \rightarrow C$ , see also Methods), which gives two apparent rate constants ( $k_1'$  and  $k_2'$ ) in addition to  
14 amplitude (Fersht, 1984). Close inspection of the fit ([Figure 1C, right panel](#)) suggests that adding  
15 additional steps would marginally improve the fit, however these additional rate constants would  
16 be fast and poorly defined; two steps therefore represents a reasonable compromise between  
17 accuracy and complexity.

18

19 In the simplest case possible, where the two steps are irreversible and have very different values,  
20  $k_1'$  and  $k_2'$  correspond to the two rates for these steps ( $k_1$  and  $k_2$ ) (Fersht, 1984). This is complicated  
21 if the reactions are reversible (in which case the reverse rates also factor), or if  $k_1$  and  $k_2$  are very  
22 similar (where they are both convoluted into  $k_1'$  and  $k_2'$ ). Nonetheless, this analysis is very useful  
23 for understanding the mechanism of import (see below) – especially under conditions where  $k_1$   
24 and  $k_2$  are well separated.

25

26 It should be noted that, because we have no information for the concentration of the intermediates,  
27 the order of the two steps cannot be determined *a priori*. However, as detailed below, they can be  
28 distinguished by perturbing the system and seeing how this affects the different rates. From this,  
29 and based on the results in the following sections, we assign  $k_1'$  as transport of the PCP through  
30 TOM and  $k_2'$  as subsequent engagement of the MTS with TIM23. It is also important to note that  
31 any additional step faster than about  $5 \text{ min}^{-1}$  will not be resolved in our experimental set up using

1 a multi-plate reader (see detailed explanation in [Figure 1 – figure supplement 2A](#)), and will instead  
2 manifest as a small apparent lag before the signal appears (equal to  $1/k_{\text{step}}$ , where  $k_{\text{step}}$  is the rate  
3 constant for that process)(Allen et al., 2020). This includes formation of NanoLuc: it is  $>7.4 \text{ min}^{-1}$   
4 <sup>1</sup> even at the lowest estimated 11S concentration, as determined in solution ([Figure 1 – figure  
5 supplement 2B](#)), and the import kinetics are not appreciably affected by the internal concentration  
6 of 11S as noted above; [Figure 1 – figure supplement 2C](#).

### 8 **Import is dependent on total protein size**

9 To begin to validate what the two apparent rates correspond to, we first designed and purified two  
10 series of four PCPs, varying either in total length or in the N- to C-terminal positioning of pep86  
11 ([Figure 3A](#)). The length variants all similarly contained the pre-sequence of Acp1 followed by the  
12 Acp1 mature domain, with pep86 (L) at the C-terminus. Increase in length was achieved by  
13 repeating the mature part of Acp1 up to three times. In between each Acp1 mature domain we  
14 included a scrambled pep86 sequence (D), which does not interact with 11S (Allen et al., 2020),  
15 such that each tandem repeat has the same overall amino acid (aa) composition.

16  
17 The length variant set was designed to reveal PCP size-dependence of any import step. The other  
18 set (position variants) were all identical to the longest length-variant PCP (four tandem repeats),  
19 but with the active pep86 (L) in different positions. Because the position variants (abbreviated as  
20 LDDD, DLDD, DDDL and DDDL) are identical save for the number of amino acids that must  
21 enter the matrix before the NanoLuc signal arises, all transport steps (including passage through  
22 TOM) should be the same for the whole set. Any differences in their import kinetics must therefore  
23 arise from the time it takes them to pass through TIM23, and not the steps prior to that. Note that  
24 as shown above ([Figure 2A](#)) and previously (Allen et al., 2020), localisation to an internal loop  
25 does not compromise the ability of pep86 to interact with 11S.

26  
27 Import of all four length variants (L, DL, DDL and DDDL) and position variants (LDDD, DLDD,  
28 DDDL and DDDL) at high concentration ( $1 \mu\text{M}$ , which is saturating for all parameters, see below  
29 ([Figure 3 – figure supplement 1](#))) fit well to the simple two-step model, giving an amplitude and  
30 two apparent rate constants, with the faster one assigned as  $k_1'$  and the other as  $k_2'$ . Import traces  
31 and the results of fits to the two-step model are plotted in [Figure 3B and C](#) respectively. We observe

1 no significant difference between any of the four position variants with respect to any of the three  
2 parameters, indicating that transport through TIM23 is fast, and does not contribute appreciably to  
3 the kinetics of import.

4  
5 For the length series, signal amplitude is inversely correlated with protein length (Figure 3C, left  
6 panel in orange). Let us suppose that, at any point during processive translocation, an import site  
7 can become compromised; for instance, by a PCP becoming trapped in the channel. In this scenario  
8 it would be reasonable to expect a longer protein to have a higher chance of failing to reach the  
9 matrix. But if this were the cause of the dependence of signal amplitude on protein length, we  
10 would expect a similar dependence for the position variants, which is not the case (Figure 3C, in  
11 teal). Instead it seems that small proteins are able to accumulate at higher levels in the matrix  
12 compared to large ones. This is consistent with our previous conclusion that the amount of 11S  
13 does not limit import, as this would result in the same maximum amplitude for all proteins.

14  
15 Strikingly, we find that  $k_1'$  has a strong inverse correlation with PCP length (but not pep86  
16 position), *i.e.* it is faster for smaller proteins (Figure 3C, middle panel). The most likely explanation  
17 for this is that  $k_1'$  corresponds to transport of the entire length of the protein across a membrane.  
18 Even more surprisingly, the corresponding step time ( $1/k_1'$ ) increases not linearly but exponentially  
19 as a function of PCP length (Figure 3D). This means that longer PCPs complete step  $k_1'$  more  
20 slowly *per amino acid*. Exponential length-dependence is not a characteristic of a powered or  
21 biased directional transport, such as we have seen previously for the Sec system (Allen et al.,  
22 2020), but rather an unbiased reversible diffusion-based mechanism (Simon et al., 1992). For  $k_2'$ ,  
23 meanwhile, there is little difference between the variants; indeed, with the exception of L, good  
24 fits can be obtained when  $k_2'$  is fixed globally (Figure 3C, right panel). Unlike  $k_1'$  therefore,  $k_2'$   
25 probably corresponds to something other than transport across a membrane.

### 26 27 **Concentration dependence of the two major rate-limiting steps of import**

28 A simple way to assign rate constants to specific events is to measure their dependence on  
29 concentration: only steps that involve association between PCP upon the initial contact with the  
30 import machinery (with the TOM complex) should show any concentration effect. We therefore  
31 measured protein import for both the length and position variants over a range of PCP



1 concentrations ([PCP]), and fitted the data for each concentration to the two-step model. Next, we  
2 plotted the concentration dependence of each of the three resulting parameters (Figure 3 – figure  
3 supplement 1), and fitted them to a weak binding (amplitude) or Michaelis Menten ( $k_1'$  and  $k_2'$ )  
4 equation (Figure 3E-F). It should be noted that the  $K_M$  values are rough estimates only, as  $k_1'$  and  
5  $k_2'$  are difficult to assign precisely.

6  
7 Unexpectedly, all three parameters show a dependence on [PCP] for the length series. The apparent  
8  $K_{MS}$  for  $k_1'$ , (Figure 3E, teal) are in the low 100s of nM and not systematically dependent on [PCP]  
9 – both reasonable for initial association of PCP and TOM. The  $K_{ds}$  for amplitude and  $K_{MS}$  for  $k_2'$ ,  
10 meanwhile (magenta and brown, respectively in Figure 3E), are very similar to each other: they  
11 are very low (tight affinity), but increase with increasing PCP length. Because amplitude and  $k_2'$   
12 behave identically, it seems reasonable to assume that they reflect the same process, i.e. the final  
13 kinetic step of transport (because amplitude is by definition successful transport). The precursor  
14 length-dependence means that, effectively, longer PCPs require a higher concentration to reach  
15 maximum amplitude (Figure 3E), even though that amplitude is lower (Figure 3B-C). One possible  
16 explanation for this is that at very low PCP concentrations, affinity of PCP in the IMS for TIM23  
17 begins to become limiting. Just as before, we find no systematic difference between the position  
18 variants (Figure 3F) – again suggesting that passage of the PCP through TIM23 is not limiting the  
19 overall import rate.

20

### 21 **Depletion of $\Delta\psi$ and ATP have very different effects on import**

22 The two driving forces ( $\Delta\psi$  and ATP) act at different stages of import (Figure 1A), so to help  
23 assign  $k_1'$  and  $k_2'$  we depleted each and measured import of the length and position variants. Partial  
24 depletion of  $\Delta\psi$  by pre-treatment of mitochondria with 10 nM valinomycin, a potassium  
25 ionophore, causes a decrease in signal amplitude for all length and position variants, affecting them  
26 roughly equally (Figure 4A, left panel). Valinomycin treatment also affects both the apparent rate  
27 constants:  $k_1'$  is somewhat slowed for shorter proteins but largely unaffected for longer ones  
28 (Figure 4A, middle panel), while  $k_2'$  is somewhat slowed for short proteins but dramatically  
29 reduced for longer ones (Figure 4A, right panel).

30

1 Depletion of matrix ATP was achieved simply by excluding ATP and its regenerating system from  
2 the assay buffer. Endogenous matrix ATP under these conditions is minimal, as is evident from  
3 the fact that import becomes highly sensitive to antimycin A, an inhibitor of oxidative  
4 phosphorylation (Figure 4 – figure supplement 1). This sensitivity arises because ATP is required  
5 for hydrolysis by the ATP synthase to maintain  $\Delta\psi$  in the absence of oxidative phosphorylation  
6 (Campanella et al., 2008). Import experiments performed with depleted ATP show reduced  
7 amplitude, but unlike valinomycin this effect is more pronounced for the longer PCPs (Figure 4B,  
8 left panel) – consistent with proposed role for ATP in promoting transport of the mature part of  
9 the PCP. ATP depletion has little or no effect on  $k_1'$  (Figure 4B, middle panel), and a relatively  
10 minor effect on  $k_2'$  (Figure 4B, right panel), affecting both the length and position variants roughly  
11 equally.

12

### 13 **A simple working model for import based on the above results**

14 Taking all the above observations together, we can as alluded to earlier propose a simplified model  
15 for import that incorporates two major rate-limiting steps. Based on its dependence on PCP  
16 concentration (Figure 3E) we assign  $k_1'$  as dependent on the initial interaction between PCP and  
17 TOM. However this concentration dependence saturates with an apparent  $K_M$  of around 100-200  
18 nM. Such saturating behaviour suggests a rapid binding equilibrium followed by a slower step  
19 (just as in Michaelis Menten kinetics), i.e.:

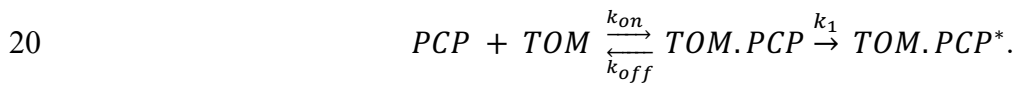

21

22 The strong dependence of  $k_1'$  on PCP length (Figure 3C, middle panel) provides a clue as to the  
23 nature of  $k_1$  – it is likely to correspond to passage of the PCP across the OM, through the TOM  
24 complex. The non-linear dependence of step time ( $1/k_1'$ ) on PCP length (Figure 3D) also suggests  
25 that this step is at least partially diffusional, rather than driven by an active energy-dependent  
26 directional motor. Furthermore, it suggests that, under these experimental conditions at least, the  
27 entire PCP passes through TOM before transport through TIM23 is initiated.

28

29 The second rate constant,  $k_2'$  is somewhat sensitive to ATP (Figure 4B, right panel), and so most  
30 likely comes at the end of import, as the contribution of Hsp70 requires at least some of the PCP  
31 to be in the matrix. Since  $k_2'$  shows very little dependence on PCP length in energised mitochondria

1 (Figure 3C, right panel), we propose that it is primarily the  $\Delta\psi$ -dependent insertion of the pre-  
2 sequence through TIM23, not the subsequent passage of the unfolded passenger domain that is  
3 limiting (although both presumably contribute to the apparent rate constant). However, under  
4 conditions of  $\Delta\psi$  depletion, a length-dependence of  $k_2'$  emerges (Figure 4A, right panel): this is  
5 consistent with import rate of the rest of the PCP being affected by  $\Delta\psi$  ((Schendzielorz et al.,  
6 2017), and see also below). It is also possible that transport of longer PCPs has a higher chance of  
7 failure, with the PCP slipping back into the IMS – this would be a useful mechanism to prevent  
8 TIM23 complexes becoming blocked with mis-folded/compacted PCPs, and would explain the  
9 difference in the effect of  $\Delta\psi$  depletion on the length and position variants.

10

11 Putting all of this together, we propose the following minimal kinetic scheme for PCP import:

12

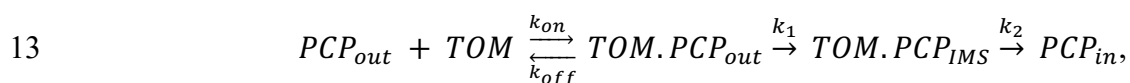

14

15 where the subscript to PCP indicates its location (outside the OM, in the IMS, or inside the matrix).  
16 In this model,  $k_{on}$  and  $k_{off}$  are both fast compared with  $k_1$ , and give an affinity ( $K_d = k_{off}/k_{on}$ ) in the  
17 order of 100 nM, similar to the affinity of a bacterial secretion preproteins to bacterial inner  
18 membrane vesicles (Hartl et al., 1990). The two extracted rate constants can be approximately  
19 determined as ([PCP] designates PCP concentration):

20

$$21 \quad k_1' \sim k_1 \frac{[PCP]}{K_d + [PCP]} \quad \text{and} \quad k_2' \sim k_2$$

22

23 This model fits the data, and we believe it is the most reasonable interpretation of the above  
24 experimental results. However it still leaves open several questions, notably the extent to which  $k_1$   
25 and  $k_2$  are reversible. For example, the fact that  $k_1'$  is somewhat affected by valinomycin (Figure  
26 4A, middle panel) suggests that  $k_1$  is reversible. Given that passage through TOM can occur in the  
27 absence of  $\Delta\psi$  (Mayer et al., 1993)(Lill et al., 1992), slowing  $k_2$  would then leave more opportunity  
28 for diffusion back out of the IMS through TOM, a process that occurs in the absence of ATP  
29 (Ungermann et al., 1996). In addition, we cannot determine from this data exactly at what stage  
30 handover from TOM to TIM23 occurs. The results suggest that PCP passes through TOM

1 completely before engaging with TIM23, but it is not clear whether this is a necessary part of the  
2 mechanism or merely an effect of the relative rates under these conditions. Nor can we determine  
3 whether handover from TOM to TIM23 is direct, or if the PCP can dissociate from TOM before  
4 binding to TIM23.

### 6 **Changing PCP net charge affects import amplitude and rate differently**

7  $\Delta\psi$ , the electrical component of the PMF (positive outside), has been proposed to act primarily  
8 upon positively charged residues in the PCP, pulling them through electrophoretically (Martin et  
9 al., 1991)(Geissler et al., 2000)(Truscott et al., 2001). To test this idea, we designed a series of  
10 proteins, based on an engineered version of a classical import substrate: the N-terminal section of  
11 yeast cytochrome *b*<sub>2</sub> lacking the stop-transfer signal ( $\Delta 43-65$ ) to enable complete matrix import  
12 (Gold et al., 2014). The variant PCPs differed only in the numbers of charged residues (Figure  
13 5A); of the same length (203 amino acids), but spanning 5.43 units of pI ranging from 4.97 to 10.4.  
14 Import of these charge variants under saturating conditions (1  $\mu$ M PCP) was measured using the  
15 NanoLuc assay as above and representative traces are shown in Figure 5B (with complete data in  
16 Figure 5 – figure supplement 1).

17  
18 The most immediately striking observation is that amplitude is strongly inversely correlated with  
19 net charge of the PCP – *i.e.* the opposite of what might be expected given the direction of  $\Delta\psi$   
20 (Figure 5C). To understand why this would be, we turned to our earlier interpretation of signal  
21 amplitude: that it is limited by the availability of  $\Delta\psi$ . If transport of positively charged residues  
22 depletes  $\Delta\psi$  while transport of negatively charged residues replenishes or maintains it, this could  
23 explain why negatively charged proteins accumulate to a higher level.

24  
25 To test this hypothesis, we monitored  $\Delta\psi$  in isolated mitochondria over time by measuring TMRM  
26 fluorescence, then assessed the effect of adding the PCPs with differing net charge (Figure 5D).  
27 The PCPs did indeed cause strong depletion of  $\Delta\psi$  and, moreover, this effect diminished with  
28 increasing net negative charge. Increasing net positive charge did not seem to result in enhanced  
29 depletion of  $\Delta\psi$ , but TMRM does not resolve  $\Delta\psi$  well in this range, so this does not necessarily  
30 mean that this effect is not occurring. A second prediction from this hypothesis is that membrane  
31 depolarisation prior to protein import will abolish the correlation between net charge and

1 amplitude. This is indeed exactly what we observe: valinomycin reduces amplitudes for all PCPs,  
2 but the effect is greater for more negatively charged PCPs, bringing all amplitudes to about the  
3 same level (Figure 5E). Depleting ATP, meanwhile, has very little effect on amplitude, just as for  
4 the Acp1-based PCPs.

5  
6 It is also clear, from the import traces for the charge series, that positively charged PCPs are  
7 imported much faster than negatively charged ones (albeit reaching a lower final amplitude; Figure  
8 5B-C). This is again consistent with  $\Delta\psi$  specifically assisting the transport of positively charged  
9 residues (Martin et al., 1991)(Geissler et al., 2000)(Truscott et al., 2001). Unlike the length variants  
10 based on Acp1 (Figure 3A), however, not all of the import traces from the charge variants (Figure  
11 5B) fit to the two step model (see Methods and Figure 1C). While the more negatively charged  
12 ones have a clear lag before reaching their maximum rate, the positively charged ones appear to  
13 have only a single rate-limiting step, or even to have a burst of rapid import, followed by a slower  
14 phase (Figure 5B). Because steps are only resolved on the plate reader if they are  $\leq$  about 5 min<sup>-1</sup>,  
15 the most likely explanation for this is that one step has become too fast to measure. This is most  
16 likely transport through TIM23, which is strongly  $\Delta\psi$ -dependent and thus presumably faster for  
17 more positively charged proteins. A burst suggests multiple turnovers, not seen for the Acp1-based  
18 DHFR-pep86 constructs (Figure 2), with the first one very fast and subsequent ones limited by a  
19 slower resetting of TIM23 (see Discussion).

20

### 21 **Validation of the observed charge and size effects with native PCPs**

22 While the use of artificial PCPs, as above, allows their properties to be varied in a systematic  
23 manner, it is possible that these modifications will affect native features with fundamental roles in  
24 the import process. To confirm that the above observations hold true for native PCPs we performed  
25 import experiments with four pep86-tagged native PCPs differing in length and charge. We chose  
26 the F<sub>1</sub>  $\alpha$  and F<sub>1</sub>  $\beta$  subunits of the mitochondrial ATP synthase, both large proteins (>500 amino  
27 acids) with mature amino acid sequences differing in predicted pI by  $\sim$  1.55 (F<sub>1</sub>  $\beta$  = 5.43 and F<sub>1</sub>  $\alpha$   
28 = 6.98); and two smaller proteins (<200 amino acids), Acp1 and Mrp21, with predicted mature  
29 sequence pIs of 4.87 and 10.00 respectively (Figure 6A).

30

1 Consistent with our earlier results, we see higher amplitudes for the shorter and more negatively  
2 charged PCPs (Figure 6B), and faster import of the shorter PCPs than the longer ones (Figure 6B).  
3 The effect of net charge holds true for the larger PCPs, which both have clear two-step import  
4 (Figure 6B), but the small PCPs appear to have only a single rate-limiting step, and do not differ  
5 significantly in import rate (Figure 6B). Presumably the charge dependence only becomes  
6 measurable when transport through TIM23 is slow enough to be appreciable. Overall, these results  
7 suggest that the data collected with artificial PCPs will hold true for native ones as well.

8  
9

## 10 DISCUSSION

11 Protein import into mitochondria is, by nature, a complicated process with machineries in two  
12 membranes having to coordinate with one another as well as with parallel import pathways to  
13 deliver a wide range of proteins to their correct destinations. Here, we have built a minimal  
14 mechanistic model of one of the major import routes – the TOM-TIM23<sup>MOTOR</sup> pathway of matrix  
15 proteins – using a high-resolution import assay based on NanoLuc (Pereira et al., 2019). Our results  
16 suggest that two major distinct events are responsible for the majority of the PCP transit time:  
17 passage of the PCP through the TOM complex and insertion of the pre-sequence through the  
18 TIM23<sup>MOTOR</sup> complex. By contrast, the initial binding of PCP to TOM is fairly rapid, as is passage  
19 of the mature PCP domain through TIM23. Crucially, the rates of the different steps correlate very  
20 poorly with the amount of PCP in the matrix when the reaction ends, which has always been the  
21 conventional readout of import. It therefore seems that this pre-steady-state kinetic approach will  
22 be critical in the future, both for further dissecting import via the TOM and TIM23<sup>MOTOR</sup>  
23 complexes and for understanding the other pathways that together comprise the mitochondrial  
24 protein import machinery.

25

26 Import appears to be largely single turnover under our experimental conditions, that is each import  
27 site only imports a single PCP. While this is fortuitous in that it allows us to access pre steady-  
28 state events easily, it is incongruent with mitochondrial protein import *in vivo*. Nonetheless, this  
29 almost certainly holds true for decades of experiments using the classic method, and offers an  
30 explanation as to why these methods require such high concentrations of mitochondria for  
31 detection of import. We propose that, under experimental conditions, import is limited by the

1 amount of energy available in the form of  $\Delta\psi$ . Indeed, measurements of  $\Delta\psi$  using TMRM confirm  
2 that PCP import causes a depolarisation of the IMM that is not restored. Also consistent with  $\Delta\psi$   
3 being consumed, we find that the PCPs that require more total energy to import (such as longer  
4 ones), or that are likely to consume more  $\Delta\psi$  (positively charged ones) reach a lower concentration  
5 in the mitochondrial matrix. Presumably isolated mitochondria, while capable of respiration and  
6 ATP synthesis, do not have the full restorative powers available to those inside cells.

7  
8 The mechanism by which  $\Delta\psi$ -depletion leads to single turnover conditions may relate to the  
9 requirement of  $\Delta\psi$  for dimerization of TIM23 and recruitment of Tim44, both required for delivery  
10 to the matrix (Bauer et al., 1996)(Martinez-Caballero et al., 2007)(Demishtein-Zohary et al.,  
11 2017)(Ting et al., 2017)(Ramesh et al., 2016). As PCPs bind only to TIM23 complexes containing  
12 two Tim23 subunits and, during transport, disrupt this conformation, loss of  $\Delta\psi$  would prohibit the  
13 resetting of the TIM23 complex to allow further turnovers after the first one (Bauer et al., 1996).  
14 With some of the faster importing PCPs we do indeed see a rapid burst of import followed by a  
15 slower phase, as would be expected for multiple turnovers where the first is fast. This could  
16 therefore provide an opportunity for future studies to investigate this priming event.

17  
18 Previous studies have shown that the TOM complex is in excess over TIM23, with 1 mg yeast  
19 mitochondria containing ~17-20 pmol TIM23 (~9-10 pmol dimer) and estimations of between 85  
20 and 250 pmol TOM40 (Sirrenberg et al., 1997)(Dekker et al., 1997). In our experiments, this  
21 TIM23 dimer concentration equates to ~62.5 fmol per well ( $10 \text{ pmol.mg}^{-1} \times 50 \text{ }\mu\text{g.ml}^{-1} \times 125 \text{ }\mu\text{l}$ )  
22 – similar to the estimated amount of 11S (~28-76 fmol per well, based on an estimated 4.46-12.17  
23 pmol.mg<sup>-1</sup>). This close correspondence presumably explains why we find that 11S is not limiting,  
24 but intriguingly, it also suggests that each import site only imported on average one 11S, even  
25 though 11S import occurred in live yeast before mitochondrial isolation. This correspondence may  
26 not be coincidental; if the number of TIM23 sites limited import, this could be calibrated as a  
27 regulatory mechanism to avoid matrix-derived proteotoxic stress.

28  
29 The transfer of PCPs from TOM to TIM23 is thought to involve cooperative interactions of  
30 subunits of the two complexes (Gomkale et al., 2021)(Callegari et al., 2020). But the extent to  
31 which transport of PCPs across the OMM and IMM is coupled *in vivo*, remains unknown. It has

1 been suggested that the rate of PCP passage through the OMM is one factor that determines  
2 whether PCPs are transferred to the matrix or released laterally into the IMM (Harner et al., 2011b),  
3 implying simultaneous and cooperative activities of TOM and TIM23. PCPs have been captured  
4 spanning both membrane complexes at the same time in super-complexes of ~600 kDa (Gomkale  
5 et al., 2021)(Dekker et al., 1997)(Gold et al., 2014)(Chacinska et al., 2010), suggesting that import  
6 through TOM does not have to be complete before import through TIM23 can begin.

7  
8 Contrasting with this, however there is also evidence to suggest that the TOM and TIM23  
9 complexes can transport PCPs independently, in steps that are not necessarily concurrent. Matrix  
10 import of PCPs has been observed in mitoplasts (Hwang et al., 1989)(Ohba and Schatz, 1987), in  
11 which the OMM has been removed, suggesting that a handover from TOM is not absolutely  
12 required. Furthermore, the *in vivo* existence of TOM-TIM23 super-complexes is unconfirmed.  
13 They have been detected only when engineered PCPs with C-terminal domains that cannot pass  
14 through TOM are used (Chacinska et al., 2003), and only under these artificial conditions do TOM  
15 and TIM23 subunits co-immuno-precipitate or co-migrate on native polyacrylamide gels (Horst et  
16 al., 1995). Perhaps their assembly is more dynamic and transient, relying on other OMM-IMM  
17 contact sites such as the MICOS complex (von der Malsburg et al., 2011)(Hoppins et al.,  
18 2011)(Harner et al., 2011a). Moreover, the N-terminal domain of Tim23, which tethers the IMM  
19 and OMM, is not required for either PCP import through TIM23, or TOM-TIM23 super-complex  
20 formation (Chacinska et al., 2003).

21  
22 Our results also hint that this handover is not absolutely required. The data here suggest that  
23 transport of a PCP through TOM is reversible, and therefore possible in the absence of TIM23  
24 activity. Reverse transport of proteins through TOM, and in some cases also through TIM23, has  
25 been observed previously, although this process is not well understood. For example, proteins that  
26 are reduced or conformationally unstable in the IMS can retro-translocate to the cytosol *via*  
27 TOM40, and the efficiency of this process is relative to protein size (both linear length and 3D  
28 complexity); smaller proteins are more efficiently retro-translocated (Bragoszewski et al., 2015).  
29 Notably, under physiological conditions, PINK1 is cleaved in the IMM by PARL, releasing the C-  
30 terminal region for release back to the cytosol for proteosomal degradation. But the process is not  
31 well understood, such as if, and how, it is regulated, and if a driving force is required. Additionally,



1 we see some PCP concentration dependence of  $k_2'$ ; if direct interaction of TOM with TIM23 were  
2 strictly required then  $k_2$  would not be affected by PCP concentration, but if PCP can accumulate  
3 in the IMS this would explain our finding.

4  
5 Overall, the above analysis provides good estimates of the two rate-limiting steps for import, and  
6 provides evidence as to the constraints that act upon the other (non-rate-limiting) steps. If a few of  
7 the above questions are resolved, we believe it should be possible to construct a complete kinetic  
8 model of mitochondrial import, as has been recently achieved for the bacterial Sec system (Allen  
9 et al., 2020).

10

## 11 **MATERIALS AND METHODS**

### 12 **Strains and plasmids**

13 *E. coli*  $\alpha$ -select cells were used for amplifying plasmid DNA and BL21 (DE3) used for protein  
14 expression. Genes encoding pep86 (trademarked as ‘SmBiT’ (Dixon et al., 2015)) -tagged  
15 mitochondrial PCP proteins (from MGW Eurofins or Thermo Fisher Scientific) were cloned into  
16 either pBAD, pRSFDuet or pE-SUMOpro. YPH499 yeast cell clones transformed with pYES2  
17 containing the mt-11S gene under control of the GAL promoter, used previously (Pereira et al.,  
18 2019), were used for isolation of mitochondria containing matrix-localised 11S (trademarked as  
19 ‘LgBiT’ (Dixon et al., 2015)). *E. coli* cells were routinely grown at 37°C on LB agar and in either  
20 LB or 2xYT medium containing appropriate antibiotics for selection. Yeast cells were grown at  
21 30°C on synthetic complete dropout (Formedium) agar supplemented with 2% glucose, penicillin  
22 and streptomycin, or in synthetic complete dropout medium, supplemented with 3% glycerol,  
23 penicillin and streptomycin in baffled flasks. For yeast cells with mitochondrial matrix-localised  
24 11S, mt-11S was expressed by adding 1% galactose at mid-log phase, 16 hours prior to harvesting  
25 of cells.

26

### 27 **Protein production and purification**

28 BL21 (DE3) cells from a single colony, containing the chosen protein expression plasmid were  
29 grown in LB overnight then sub-cultured in 2XYT medium until OD<sub>600</sub> reached 0.6. For pBAD  
30 and pRSFDuet plasmids protein expression was induced by adding arabinose or IPTG  
31 respectively. Cells were harvested 2-3 hours later and lysed using a cell disrupter (Constant

1 Systems Ltd.). Proteins were purified from inclusion bodies using Nickel affinity chromatography  
2 on prepacked HisTrap FF columns (Cytiva, UK), followed by ion exchange chromatography on  
3 either HiTrap Q HP or HiTrap SP HP columns (Cytiva, UK) depending on protein charge,  
4 described in full previously (Pereira et al., 2019). Proteins from pE-SUMOpro plasmids (those  
5 containing DHFR domains), were expressed by adding IPTG, and cells harvested after 18 hours  
6 of further growth at 18°C. Proteins were purified at 4°C from the soluble fraction, essentially as  
7 before (Aelst et al., 2019), but with 250 mM NaCl in their “Buffer C”. A further purification step,  
8 on a HiLoad 16/60 Superdex gel filtration column (Cytiva, UK) was included to remove remaining  
9 contaminants. A full list of PCPs, their amino acid sequences and respective expression vectors  
10 are given in Supplementary Table 1.

## 11 12 **Isolation of mitochondria from yeast cells**

13 Yeast cells were harvested by centrifugation (4,000 x g, 10 min, room temperature) and  
14 mitochondria isolated by differential centrifugation (Daum et al., 1982). Briefly, cell walls were  
15 digested with zymolyase in phosphate-buffered sorbitol (1.2 M sorbitol, 20 mM potassium  
16 phosphate pH 7.4), after being reduced with DTT (1 mM DTT in 100 mM Tris-SO<sub>4</sub> at pH 9.4, for  
17 15 min at 30°C). Cells were disrupted at 4°C with a glass Potter-Elvehjem homogeniser with  
18 motorised pestle in a standard homogenisation buffer (0.6 M sorbitol, 0.5% (w/v) BSA, 1 mM  
19 PMSF, 10 mM Tris-HCl pH 7.4). The suspension was centrifuged at low speed (1,480 x g, 5 min)  
20 to pellet unbroken cells, cell debris and nuclei, and mitochondria harvested from the supernatant  
21 by centrifugation at 17,370 x g. The pellet, containing mitochondria, was washed in SM buffer  
22 (250 mM sucrose and 10 mM MOPS, pH 7.2), and then centrifuged at low speed again, to remove  
23 remaining contaminants. The final mitochondrial sample, isolated from the supernatant by  
24 centrifugation (17,370 x g, 15 min), was resuspended in SM buffer and protein quantified by  
25 bicinchoninic acid (BCA) assay (Smith et al., 1985) using a bovine serum albumin protein  
26 standard. Mitochondria were stored at -80°C, at a concentration of at 30 mg/ml in single use  
27 aliquots, after being snap frozen in liquid nitrogen.

## 28 29 **Western blotting**

30 Samples of mitochondria from yeast cells were solubilised in SDS-PAGE sample buffer (2 % (w/v)  
31 SDS, 10% (v/v) glycerol, 62.5 mM Tris-HCl pH 6.8, 0.01% (w/v) bromophenol blue, and 25 mM

1 DTT), and fractionated on a 15% (w/v) acrylamide, 375 mM Tris pH 8.8, 0.1% (w/v) SDS gel  
2 with a 5% (w/v) acrylamide, 126 mM Tris pH 6.8, 0.1% (w/v) SDS stacking gel, in Tris-Glycine  
3 running buffer pH 8.3 (25 mM Tris, 192 mM glycine, 0.1% (w/v) SDS). Proteins were electro-  
4 transferred to PVDF membrane in 10 mM NaHCO<sub>3</sub>, 3mM Na<sub>2</sub>CO<sub>3</sub>, then membranes incubated in  
5 blocking buffer (TBS (50 mM Tris-Cl pH 7.5, 150 mM NaCl) containing 0.1% (v/v) Tween 20  
6 and 5% (w/v) skimmed milk powder). 11S protein was detected with a rabbit polyclonal antibody  
7 from Promega, and Tom40 with a rabbit polyclonal antibody produced by Cambridge Research  
8 Biochemicals (Billingham, UK). Primary antibody incubations were at 4°C for 18 h in blocking  
9 buffer. Membranes were washed in TBS containing 0.1% (v/v) Tween 20, three times, each for 10  
10 minutes, before incubation for 1 hour with a HRP-conjugated goat secondary antibody against  
11 rabbit IgG (Thermo Fisher Scientific), in blocking buffer. Membranes were washed, as before, and  
12 antibodies visualised using 1.25 mM luminol, with 198 µM coumaric acid as enhancer, and  
13 0.015% (v/v) H<sub>2</sub>O<sub>2</sub> in 100 mM Tris-Cl pH 8.5.

14

#### 15 **NanoLuc import assay**

16 Unless stated otherwise, import experiments were performed at 25°C with mt-11S mitochondria  
17 diluted to 50 µg/ml in import buffer (250 mM sucrose, 80 mM KCl, 1 mM K<sub>2</sub>HPO<sub>4</sub>/KH<sub>2</sub>PO<sub>4</sub>, 5  
18 mM MgCl<sub>2</sub>, 10 mM MOPS-KOH and 0.1% (v/v) Prionex reagent (Merck), pH 7.2), supplemented  
19 with 2 mM NADH, 1 mM ATP, 0.1 mg/ml creatine kinase, 5 mM phosphocreatine, and 1 µM  
20 pep86-tagged PCP protein. We also added 10 µM GST-Dark protein; a fusion of glutathione S-  
21 transferase and a peptide with high affinity for 11S that inhibits pep86 binding and concomitant  
22 enzymatic activity, and thereby reduces background signal caused by trace amounts of 11S outside  
23 the mitochondrial matrix (Pereira et al., 2019). Mitochondria and GST-Dark were added to 1X  
24 import buffer at 1.25X final concentrations (mixture 1), and pep86-tagged PCP, NADH, ATP,  
25 creatine kinase and phosphocreatine added to 1X import buffer at 5X final concentrations (mixture  
26 2) so that import reactions could be started by the injection of 4 vols mixture 1 onto 1 vol mixture  
27 2. For experiments that involved MTX, PCPs were incubated in the presence of 5.57 mM DTT  
28 and in the presence or absence of 524 µM MTX and 524 µM NADPH (15 min at 21°C). Urea was  
29 added for a final concentration of 3.5 M, 10 minutes before addition to the import mixture (as 4 µl  
30 at 1.25 µM). Final concentrations of MTX and NADPH were 5 µM. For measurement of pep86  
31 binding to 11S in solution, mitochondria were first solubilised by incubation with digitonin (5

1 mg/ml) at 4°C for 15 min. In selected experiments, depletion of  $\Delta\psi$  was achieved by pre-treating  
2 mitochondria for 5 min with 10 nM valinomycin, and depletion of ATP was achieved by omitting  
3 ATP, creatine kinase and phosphocreatine from the reaction. ATP depletion was verified by  
4 monitoring sensitivity of mitochondria to a 5 min pre-treatment with 0.5  $\mu$ M Antimycin A. PCP  
5 import is affected by Antimycin A when ATP is depleted but not under standard conditions.  
6 Luminescence was read from 125  $\mu$ l reactions in a white round-bottom 96 well plate (Thermo  
7 Scientific) on either a CLARIOStar Plus (BMG LABTECH), or a BioTek Synergy Neo2 plate  
8 reader (BioTek Instruments) without emission filters. Measurements were taken every 6 seconds  
9 or less, and acquisition time was either 0.1 seconds (on the CLARIOStar Plus reader) or 0.2  
10 seconds (on the Synergy Neo2 reader).

11  
12 **Estimation of mitochondrial matrix volume**

13 The mitochondrial matrix volume as a fraction of reaction volume was estimated using the  
14 previously published yeast mitochondrial matrix volume of  $1.62 \pm 0.3 \mu$ l/mg (Koshkin and  
15 Greenberg, 2002). Thus when mitochondria are at 50  $\mu$ g/ml, matrix volume will be  $81 \pm 15$  nl/ml,  
16 or  $\sim 1/12345.68$  total volume (between  $1/15151.5$  and  $1/10416.7$  accounting for error).

17  
18 **Data processing and analysis**

19 NanoLuc assay data were processed using a combination of software: Microsoft Excel, pro Fit 7  
20 and GraphPad Prism versions 8 and 9. Data were then normalised to the maximum luminescence  
21 measurement for each experiment.

22 In most cases, the resulting data were fitted using pro Fit to a model for two consecutive,  
23 irreversible steps, where the final one gives rise to a signal (Fersht, 1984):

24 
$$Y = A_0 \left( 1 + \frac{1}{k_1 - k_2} (k_2 e^{-k_1 t} - k_1 e^{-k_2 t}) \right),$$

25 where  $A_0$  is amplitude,  $k_1$  and  $k_2$  the two rate constants,  $Y$  the signal and  $t$  is time. Note that this  
26 equation produces the same result whichever order  $k_1$  and  $k_2$  are in. Subsequent analyses of the  
27 resultant data were done in GraphPad Prism; linear and non-linear (Michaelis-Menten) regression.

28  
29 **Membrane potential measurements with isolated mitochondria**

30 Isolated mitochondria were diluted to 50  $\mu$ g/ml in import buffer (described above) supplemented  
31 with 1 mM ATP, 0.1 mg/ml creatine kinase, 5 mM phosphocreatine, 10  $\mu$ M GST-Dark protein

1 and 0.5  $\mu$ M Tetramethylrhodamine methyl ester (TMRM). Relative  $\Delta\psi$  was monitored over time  
2 as a change in fluorescence of the  $\Delta\psi$ -dependent dye TMRM in quenching mode. Fluorescence  
3 was measured at an excitation wavelength of 548 nm and an emission wavelength of 574 nm, in  
4 black plates, on a BioTek Synergy Neo2 plate reader (BioTek Instruments). The inner membrane  
5 PMF was generated by injecting 2 mM NADH, and PCP proteins added manually after  
6 stabilisation of fluorescence. Depolarisation was confirmed at the end of the assay by injecting  
7 CCCP.

8

### 9 **Acknowledgments:**

10 We would like to thank Prof. Andrew Halestrap for his insight and enthusiastic discussions on the  
11 mysteries of mitochondrial bioenergetics. We also thank past and present members of the  
12 Collinson lab who helped to get this project off the ground, particularly Drs Andrew Richardson  
13 and Dylan Noone.

14

### 15 **Funding:**

16 This research was funded by the Wellcome Trust: Investigator Award to IC (104632/Z/14/Z).

17

### 18 **Author contribution:**

19 Project conceptualisation: GCP, HCF and IC

20 Sample preparation: HCF and XL

21 Data Collection: HCF

22 Data Analysis: HCF and WJA

23 Data interpretation: HCF, WJA and MSD

24 Manuscript writing: HCF, WJA, GCP and IC

25 Funding acquisition and project management: IC

26

### 27 **Declarations:**

28 The authors declare no competing interests. The funding agency and the University had no role in  
29 study design, data collection and analysis, decision to publish, or preparation of the manuscript.

1 For the purpose of Open Access, the author has applied a CC BY public copyright licence to any  
2 Author Accepted Manuscript version arising from this submission.

#### 4 REFERENCES

- 6 Aelst K van, Martínez-Santiago CJ, Cross SJ, Szczelkun MD. 2019. The Effect of DNA  
7 Topology on Observed Rates of R-Loop Formation and DNA Strand Cleavage by CRISPR  
8 Cas12a. *Genes* 2019, Vol 10, Page 169 **10**:169. doi:10.3390/GENES10020169
- 9 Ahting U, Thieffry M, Engelhardt H, Hegerl R, Neupert W, Nussberger S. 2001. Tom40, the  
10 pore-forming component of the protein-conducting TOM channel in the outer membrane of  
11 mitochondria. *J Cell Biol.* doi:10.1083/jcb.153.6.1151
- 12 Allen WJ, Watkins DW, Dillingham MS, Collinson I. 2020. Refined measurement of SecA-  
13 driven protein secretion reveals that translocation is indirectly coupled to ATP turnover.  
14 *Proc Natl Acad Sci U S A* **117**:31808–31816. doi:10.1073/pnas.2010906117
- 15 Araiso Y, Tsutsumi A, Qiu J, Imai K, Shiota T, Song J, Lindau C, Wenz LS, Sakaue H, Yunoki  
16 K, Kawano S, Suzuki J, Wischnewski M, Schütze C, Ariyama H, Ando T, Becker T,  
17 Lithgow T, Wiedemann N, Pfanner N, Kikkawa M, Endo T. 2019. Structure of the  
18 mitochondrial import gate reveals distinct preprotein paths. *Nature* **575**:395–401.  
19 doi:10.1038/s41586-019-1680-7
- 20 Bauer MF, Sirrenberg C, Neupert W, Brunner M. 1996. Role of Tim23 as voltage sensor and  
21 presequence receptor in protein import into mitochondria, *Cell.* doi:10.1016/S0092-  
22 8674(00)81320-3
- 23 Blom J, Kubrich M, Rassow J, Voos W, Dekker PJT, Maarse AC, Meijer M, Pfanner N,  
24 Maarse JC, Blom LA, Grivell M, Meijer J. 1993. The Essential Yeast Protein MIM44  
25 (encoded by MPI) Is Involved in an Early Step of Preprotein Translocation across the  
26 Mitochondrial Inner Membrane The essential yeast gene MPI1 encodes a mitochondrial  
27 membrane protein that is possibly involved in protein. *Mol Cell Biol* **13**:7364–7371.
- 28 Bragoszewski P, Wasilewski M, Sakowska P, Gornicka A, Böttinger L, Qiu J, Wiedemann N,  
29 Chacinska A. 2015. Retro-translocation of mitochondrial intermembrane space proteins.  
30 *Downloaded Univ Bristol Inf Serv* **112**. doi:10.1073/pnas.1504615112
- 31 Callegari S, Cruz-Zaragoza LD, Rehling P. 2020. From TOM to the TIM23 complex – handing

- 1 over of a precursor. *Biol Chem* **401**:709–721. doi:10.1515/HSZ-2020-0101
- 2 Campanella M, Casswell E, Chong S, Farah Z, Wieckowski MR, Abramov AY, Tinker A,  
3 Duchon MR. 2008. Regulation of Mitochondrial Structure and Function by the F1Fo-  
4 ATPase Inhibitor Protein, IF1. *Cell Metab* **8**:13–25. doi:10.1016/J.CMET.2008.06.001
- 5 Chacinska A, Rehling P, Guiard B, Frazier AE, Schulze-Specking A, Pfanner N, Voos W,  
6 Meisinger C. 2003. Mitochondrial translocation contact sites: separation of dynamic and  
7 stabilizing elements in formation of a TOM–TIM–preprotein supercomplex. *EMBO J*  
8 **22**:5370. doi:10.1093/EMBOJ/CDG532
- 9 Chacinska A, van der Laan M, Mehnert CS, Guiard B, Mick DU, Hutu DP, Truscott KN,  
10 Wiedemann N, Meisinger C, Pfanner N, Rehling P. 2010. Distinct Forms of Mitochondrial  
11 TOM-TIM Supercomplexes Define Signal-Dependent States of Preprotein Sorting. *Mol*  
12 *Cell Biol* **30**:307–318. doi:10.1128/mcb.00749-09
- 13 Chandel NS. 2015. Evolution of Mitochondria as Signaling Organelles. *Cell Metab*.  
14 doi:10.1016/j.cmet.2015.05.013
- 15 Chen Q, Vazquez EJ, Moghaddas S, Hoppel CL, Lesnefsky EJ. 2003. Production of reactive  
16 oxygen species by mitochondria: Central role of complex III. *J Biol Chem* **278**:36027–  
17 36031. doi:10.1074/jbc.M304854200
- 18 Daum G, Böhni PC, Schatz G. 1982. Import of proteins into mitochondria. Cytochrome b2 and  
19 cytochrome c peroxidase are located in the intermembrane space of yeast mitochondria. *J*  
20 *Biol Chem* **257**:13028–13033. doi:10.1016/S0021-9258(18)33617-2
- 21 Dekker PJT, Martin F, Maarse AC, Bömer U, Müller H, Guiard B, Meijer M, Rassow J, Pfanner  
22 N. 1997. The Tim core complex defines the number of mitochondrial translocation contact  
23 sites and can hold arrested preproteins in the absence of matrix Hsp70-Tim44. *EMBO J*  
24 **16**:5408–5419. doi:10.1093/emboj/16.17.5408
- 25 Demishtein-Zohary K, Günsel U, Marom M, Banerjee R, Neupert W, Azem A, Mokranjac D.  
26 2017. Role of Tim17 in coupling the import motor to the translocation channel of the  
27 mitochondrial presequence translocase. *Elife* **6**. doi:10.7554/ELIFE.22696
- 28 Dixon AS, Schwinn MK, Hall MP, Zimmerman K, Otto P, Lubben TH, Butler BL, Binkowski  
29 BF, Machleidt T, Kirkland TA, Wood MG, Eggers CT, Encell LP, Wood K V. 2015.  
30 NanoLuc Complementation Reporter Optimized for Accurate Measurement of Protein  
31 Interactions in Cells. *ACS Chem Biol* **11**:400–408. doi:10.1021/ACSCHEMBIO.5B00753

- 1 Eilers M, Schatz G. 1986. Binding of a specific ligand inhibits import of a purified precursor  
2 protein into mitochondria. *Nature* **322**:228–32. doi:10.1038/322228a0
- 3 Emtage JLT, Jensen RE. 1993. MAS6 Encodes an Essential Inner Membrane Component of the  
4 Yeast Mitochondrial Protein Import Pathway. *J Cell Biol* **122**:1003–1012.
- 5 Fersht A. 1984. Enzyme Structure and Mechanism.
- 6 Geissler A, Krimmer T, Bömer U, Guiard B, Rassow J, Pfanner N. 2000. Membrane Potential-  
7 Driven Protein Import into Mitochondria The Sorting Sequence of Cytochrome b 2  
8 Modulates the-Dependence of Translocation of the Matrix-targeting Sequence, Molecular  
9 Biology of the Cell.
- 10 Gold VA, Chroscicki P, Bragoszewski P, Chacinska A. 2017. Visualization of cytosolic  
11 ribosomes on the surface of mitochondria by electron cryo-tomography. *EMBO Rep*  
12 **18**:1786–1800. doi:10.15252/embr.201744261
- 13 Gold VAM, Ieva R, Walter A, Pfanner N, Van Der Laan M, Kühlbrandt W. 2014. Visualizing  
14 active membrane protein complexes by electron cryotomography. *Nat Commun* **5**.  
15 doi:10.1038/ncomms5129
- 16 Gomkale R, Linden A, Neumann P, Schendzielorz AB, Stoldt S, Dybkov O, Kilisch M, Schulz  
17 C, Cruz-Zaragoza LD, Schwappach B, Ficner R, Jaboks S, Urlaub H, Rehling P. 2021.  
18 Mapping protein interactions in the active TOMTIM23 supercomplex. *Nat Commun* **12**:1–  
19 17.
- 20 Guan Z, Yan L, Wang Q, Qi L, Hong S, Gong Z, Yan C, Yin P. 2021. Structural insights into  
21 assembly of human mitochondrial translocase TOM complex. *Cell Discov* **7**:22.  
22 doi:10.1038/s41421-021-00252-7
- 23 Harner M, Körner C, Walther D, Mokranjac D, Kaesmacher J, Welsch U, Griffith J, Mann M,  
24 Reggiori F, Neupert W. 2011a. The mitochondrial contact site complex, a determinant of  
25 mitochondrial architecture. *EMBO J* **30**:4356–4370. doi:10.1038/EMBOJ.2011.379
- 26 Harner M, Neupert W, Deponte M. 2011b. Lateral release of proteins from the TOM complex  
27 into the outer membrane of mitochondria. *EMBO J* **30**:3232–3241.  
28 doi:10.1038/EMBOJ.2011.235
- 29 Hartl FU, Lecker S, Schiebel E, Hendrick JP, Wickner W. 1990. The binding cascade of SecB to  
30 SecA to SecY E mediates preprotein targeting to the E. coli plasma membrane. *Cell*  
31 **63**:269–279. doi:10.1016/0092-8674(90)90160-G



- 1 Hoppins S, Collins SR, Cassidy-Stone A, Hummel E, DeVay RM, Lackner LL, Westermann B,  
2 Schuldiner M, Weissman JS, Nunnari J. 2011. A mitochondrial-focused genetic interaction  
3 map reveals a scaffold-like complex required for inner membrane organization in  
4 mitochondria. *J Cell Biol* **195**:323. doi:10.1083/JCB.201107053
- 5 Horst M, Hilfiker-Rothenfluh S, Oppliger W, Schatz G. 1995. Dynamic interaction of the protein  
6 translocation systems in the inner and outer membranes of yeast mitochondria. *EMBO J*  
7 **14**:2293–2297. doi:10.1002/J.1460-2075.1995.TB07223.X
- 8 Hoth M, Fanger CM, Lewis RS. 1997. Mitochondrial regulation of store-operated calcium  
9 signaling in T lymphocytes. *J Cell Biol*. doi:10.1083/jcb.137.3.633
- 10 Hwang S, Jascur T, Vestweber D, Pon L, Schatz G. 1989. Disrupted yeast mitochondria can  
11 import precursor proteins directly through their inner membrane. *J Cell Biol* **109**:487–493.  
12 doi:10.1083/jcb.109.2.487
- 13 Koshkin V, Greenberg ML. 2002. Cardiolipin prevents rate-dependent uncoupling and provides  
14 osmotic stability in yeast mitochondria. *Biochem J* **364**:317. doi:10.1042/BJ3640317
- 15 Lill R, Stuart RA, Drygas ME, Nargang FE, Neupert W. 1992. Import of cytochrome c heme  
16 lyase into mitochondria: a novel pathway into the intermembrane space. *EMBO J* **11**:449–  
17 456. doi:10.1002/J.1460-2075.1992.TB05074.X
- 18 Maarse AC, Blom J, Grivell LA, Meijer M. 1992. MPI1, an essential gene encoding a  
19 mitochondrial membrane protein, is possibly involved in protein import into yeast  
20 mitochondria. *EMBO J* **11**:3619–3628. doi:10.1002/J.1460-2075.1992.TB05446.X
- 21 Maarse AC, Blom J, Keilb P, Pfanner N, Meijer M. 1994. Identification of the essential yeast  
22 protein MIM17, an integral mitochondrial inner membrane protein involved in protein  
23 import. *FEBS Lett* **349**:15–22.
- 24 Martin J, Mahlke K, Pfanner N. 1991. Role of an energized inner membrane in mitochondrial  
25 protein import:  $\Delta\Psi$  drives the movement of presequences. *J Biol Chem* **266**:18051–18057.  
26 doi:10.1016/s0021-9258(18)55235-2
- 27 Martinez-Caballero S, Grigoriev SM, Herrmann JM, Campo ML, Kinnally KW. 2007. Tim17p  
28 regulates the twin pore structure and voltage gating of the mitochondrial protein import  
29 complex TIM23. *J Biol Chem* **282**:3584–3593. doi:10.1074/JBC.M607551200
- 30 Matouschek A, Azem A, Ratliff K, Glick BS, Schmid K, Schatz G. 1997. Active unfolding of  
31 precursor proteins during mitochondrial protein import **16**:6727–6736.

- 1 Mayer A, Lill R, Neupert W. 1993. Translocation and insertion of precursor proteins into  
2 isolated outer membranes of mitochondria. *J Cell Biol* **121**:1233–1243.  
3 doi:10.1083/JCB.121.6.1233
- 4 Neupert W, Brunner M. 2002. THE PROTEIN IMPORT MOTOR **3**. doi:10.1038/nrm878
- 5 Neupert W, Herrmann JM. 2007. Translocation of Proteins into Mitochondria.  
6 doi:10.1146/annurev.biochem.76.052705.163409
- 7 Nicholls DG. 1978. The regulation of extramitochondrial free calcium ion concentration by rat  
8 liver mitochondria. *Biochem J* **176**:463–474. doi:10.1042/bj1760463
- 9 Nishikawa T, Edelstein D, Du XL, Yamagishi SI, Matsumura T, Kaneda Y, Yorek MA, Beebe  
10 D, Oates PJ, Hammes HP, Glardino I, Brownlee M. 2000. Normalizing mitochondrial  
11 superoxide production blocks three pathways of hyperglycaemic damage. *Nature* **404**:787–  
12 790. doi:10.1038/35008121
- 13 Nowinski SM, Van Vranken JG, Dove KK, Rutter J. 2018. Impact of Mitochondrial Fatty Acid  
14 Synthesis on Mitochondrial Biogenesis. *Curr Biol*. doi:10.1016/j.cub.2018.08.022
- 15 Ohba M, Schatz G. 1987. Disruption of the outer membrane restores protein import to trypsin-  
16 treated yeast mitochondria. *EMBO J* **6**:2117–2122. doi:10.1002/j.1460-  
17 2075.1987.tb02478.x
- 18 Pereira GC, Allen WJ, Watkins DW, Buddrus L, Noone D, Liu X, Richardson AP, Chacinska A,  
19 Collinson I. 2019. A High-Resolution Luminescent Assay for Rapid and Continuous  
20 Monitoring of Protein Translocation across Biological Membranes. *J Mol Biol* **431**:1689–  
21 1699. doi:10.1016/j.jmb.2019.03.007
- 22 Pfanner N, Müller HK, Harmey MA, Neupert W. 1987. Mitochondrial protein import:  
23 involvement of the mature part of a cleavable precursor protein in the binding to receptor  
24 sites. *EMBO J* **6**:3449–3454. doi:10.1002/J.1460-2075.1987.TB02668.X
- 25 Ramesh A, Peleh V, Martinez-Caballero S, Wollweber F, Sommer F, Laan M van der, Schroda  
26 M, Alexander RT, Campo ML, Herrmann JM. 2016. A disulfide bond in the TIM23  
27 complex is crucial for voltage gating and mitochondrial protein import. *J Cell Biol* **214**:417.  
28 doi:10.1083/JCB.201602074
- 29 Rassow J, Guiard B, Wienhues U, Herzog V, Hartl FU, Neupert W. 1989. Translocation arrest  
30 by reversible folding of a precursor protein imported into mitochondria. A means to  
31 quantitate translocation contact sites. *J Cell Biol* **109**:1421–1428.

- 1       doi:10.1083/jcb.109.4.1421
- 2       Rassow J, Hartl FU, Guiard B, Pfanner N, Neupert W. 1990. Polypeptides traverse the  
3       mitochondrial envelope in an extended state. *FEBS Lett* **275**:190–194. doi:10.1016/0014-  
4       5793(90)81469-5
- 5       Rouault TA. 2012. Biogenesis of iron-sulfur clusters in mammalian cells: New insights and  
6       relevance to human disease. *DMM Dis Model Mech*. doi:10.1242/dmm.009019
- 7       Schendzielorz AB, Schulz C, Lytovchenko O, Clancy A, Guiard B, Ieva R, van der Laan M,  
8       Rehling P. 2017. Two distinct membrane potential-dependent steps drive mitochondrial  
9       matrix protein translocation. *J Cell Biol* **216**:83–92. doi:10.1083/jcb.201607066
- 10      Simon SM, Peskin CS, Oster GF. 1992. What drives the translocation of proteins? *Proc Natl*  
11      *Acad Sci {USA}* **89**:3770–3774.
- 12      Sirrenberg C, Endres M, Becker K, Bauert MF, Walther E, Neupert W, Brunner M. 1997.  
13      Functional cooperation and stoichiometry of protein translocases of the outer and inner  
14      membranes of mitochondria. *J Biol Chem* **272**:29963–29966. doi:10.1074/jbc.272.47.29963
- 15      Smith PK, Krohn RI, Hermanson GT, Mallia AK, Gartner FH, Frovenzano MD, Fujimoto EK,  
16      Goeke NM, Olson BJ, Klenk DC. 1985. Measurement of Protein Using Bicinchoninic  
17      Acid’.
- 18      Ting SY, Yan NL, Schilke BA, Craig EA. 2017. Dual interaction of scaffold protein Tim44 of  
19      mitochondrial import motor with channel-forming translocase subunit Tim23. *Elife* **6**.  
20      doi:10.7554/ELIFE.23609
- 21      Truscott KN, Kovermann P, Geissler A, Merlin A, Meijer M, Driessen AJM, Rassow J, Pfanner  
22      N, Wagner R. 2001. A presequence- and voltage-sensitive channel of the mitochondrial  
23      preprotein translocase formed by Tim23. *Nat Struct Biol* **2001 812** **8**:1074–1082.  
24      doi:10.1038/nsb726
- 25      Tucker K, Park E. 2019. Cryo-EM structure of the mitochondrial protein-import channel TOM  
26      complex at near-atomic resolution. *Nat Struct Mol Biol* **26**:1158–1166. doi:10.1038/s41594-  
27      019-0339-2
- 28      Ungermann C, Guiard B, Neupert W, Cyr DM. 1996. The  $\Delta\Psi$ - and Hsp70/MIM44-dependent  
29      reaction cycle driving early steps of protein import into mitochondria. *EMBO J* **15**:735–744.  
30      doi:10.1002/J.1460-2075.1996.TB00409.X
- 31      Vögtle FN, Wortelkamp S, Zahedi RP, Becker D, Leidhold C, Gevaert K, Kellermann J, Voos

- 1 W, Sickmann A, Pfanner N, Meisinger C. 2009. Global Analysis of the Mitochondrial N-  
2 Proteome Identifies a Processing Peptidase Critical for Protein Stability. *Cell* **139**:428–439.  
3 doi:10.1016/j.cell.2009.07.045
- 4 von der Malsburg K, Müller JM, Bohnert M, Oeljeklaus S, Kwiatkowska P, Becker T,  
5 Loniewska-Lwowska A, Wiese S, Rao S, Milenkovic D, Hutu DP, Zerbes RM, Schulze-  
6 Specking A, Meyer HE, Martinou JC, Rospert S, Rehling P, Meisinger C, Veenhuis M,  
7 Warscheid B, van der Klei IJ, Pfanner N, Chacinska A, van der Laan M. 2011. Dual Role of  
8 Mitofilin in Mitochondrial Membrane Organization and Protein Biogenesis. *Dev Cell*  
9 **21**:694–707. doi:10.1016/j.devcel.2011.08.026
- 10 Wachter C, Schatz G, Glick BS. 1994. Protein import into mitochondria: the requirement for  
11 external ATP is precursor-specific whereas intramitochondrial ATP is universally needed  
12 for translocation into the matrix. *Mol Biol Cell* **5**:465–474. doi:10.1091/mbc.5.4.465
- 13 Wang C, Youle RJ. 2009. The role of mitochondria in apoptosis. *Annu Rev Genet.*  
14 doi:10.1146/annurev-genet-102108-134850
- 15 Wurm CA, Jakobs S. 2006. Differential protein distributions define two sub-compartments of the  
16 mitochondrial inner membrane in yeast. *FEBS Lett* **580**:5628–5634.  
17 doi:10.1016/j.febslet.2006.09.012  
18  
19

1 **FIGURES**

Figure 1.

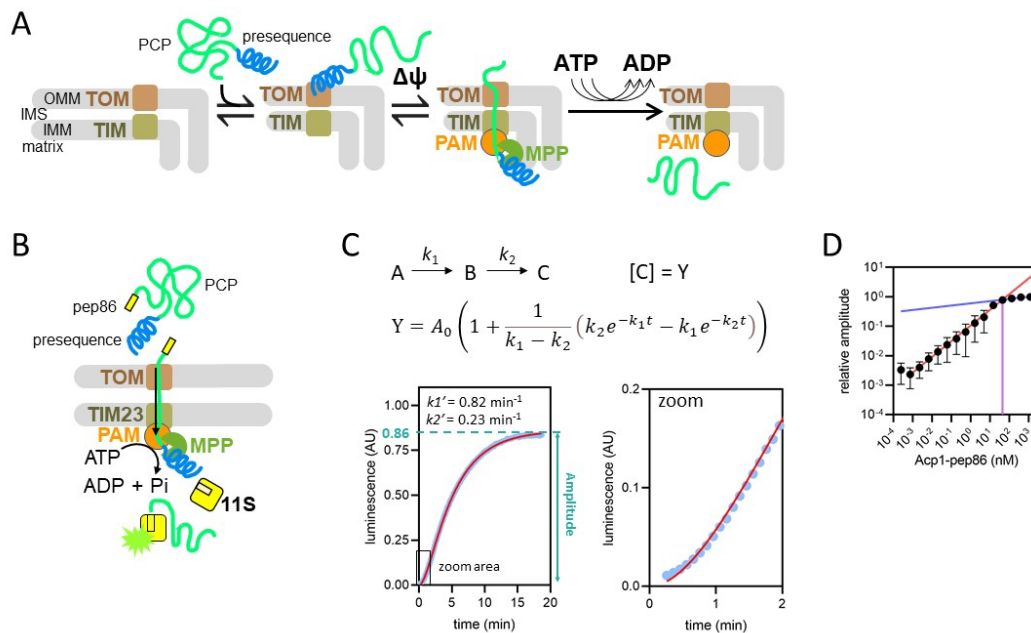

2

3 **Figure 1: Model of PCP import into mitochondria and outline of the NanoLuc import assay**

4 **A)** Simple model of presequence-containing precursor (PCP) import into mitochondria, showing  
 5 binding of PCP to the TOM complex,  $\Delta\psi$ -dependent movement of the presequence into the matrix  
 6 and ATP-dependent translocation of the remainder of the protein.

7 **B)** Diagrammatic representation of the NanoLuc real-time import assay, which is essentially the  
 8 model in A plus the binding of the C-terminal pep86 to internalised 11S which forms NanoLuc  
 9 in the matrix.

10 **C)** An example of luminescence data from the NanoLuc import assay of 1  $\mu\text{M}$  DDL (length  
 11 variant, see results) in energised mitochondria, showing the fit to a model for two consecutive,  
 12 irreversible steps (see Methods). The final step gives rise to signal such that [C] (concentration of  
 13 C) is proportional to luminescence. The order of the two steps is assigned arbitrarily.

14 **D)** The effect of varying PCP concentration (Acp1-pep86) on amplitude of signal from import  
 15 reactions. A straight line was fitted to the data where amplitude increased linearly with PCP  
 16 concentration (red), and to the data where amplitude increased only marginally (blue). The  
 17 intersect of these lines and corresponding PCP concentration ( $\sim 45$  nM), the point of plateau, is  
 18 also shown (purple).

19

Figure 2.

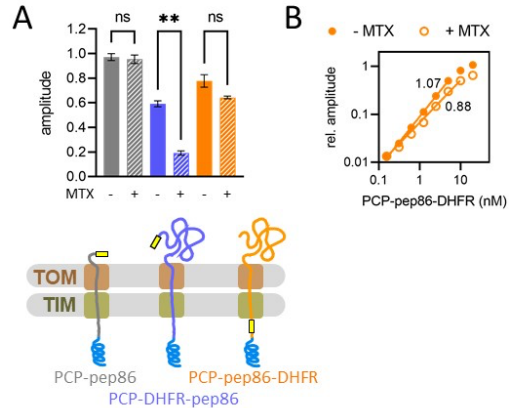

1

## 2 **Figure 2: Basic characterisation of PCP import and turnover number**

3 **A)** The effect of MTX on signal amplitude of three proteins (depicted schematically below): PCP-  
4 pep86 (grey), for which MTX should have no effect; PCP-DHFR-pep86 (blue), where MTX  
5 prevents entry of pep86; and PCP-pep86-DHFR (orange), where MTX limits import to one pep86  
6 per import site. Bars show the average and SEM from three independent biological replicates.  
7 Differences between groups were analysed using a one-way ANOVA test, with Geisser-  
8 Greenhouse correction applied, followed by the Holm-Sidak multiple comparisons test. \*\*,  
9  $P < 0.05$ ; ns, not significant.

10 **B)** Signal amplitude as a function of PCP-pep86-DHFR concentration in the absence (solid circles)  
11 and presence (open circles) of MTX.

12

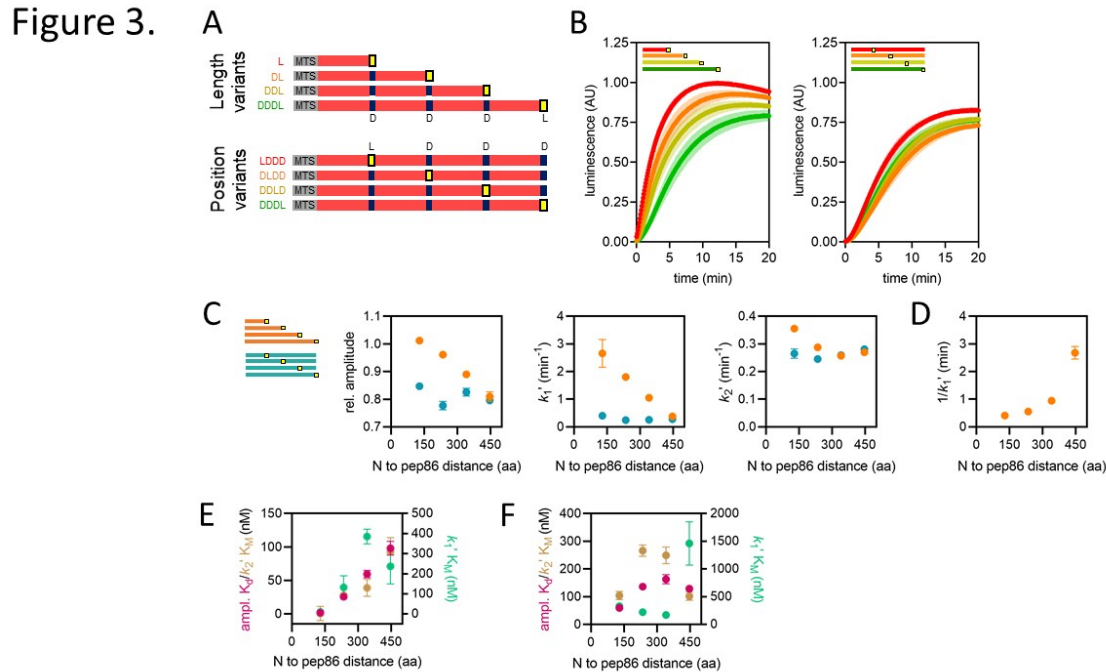

1 **Figure 3: Using proteins of varying lengths to elucidate import kinetics**

2 **A)** Schematic of two protein series (length variants and position variants), with native MTS and  
 3 mature part of Acp1 in grey and red respectively, pep86 in yellow (L for Live) and scrambled  
 4 pep86 in dark blue (D for Dead, i.e. it does not complement 11S).

5 **B)** Example of import traces for length variants (left panel) and position variants (right panel).  
 6 Error bars shown partially transparent in the same colours as the main traces. Those smaller than  
 7 the main trace are not shown. SD from biological triplicate, each conducted in duplicate.

8 **C)** Parameters obtained from two step fits to the data shown in panel B. The length variant series  
 9 is shown in orange and the position variant series in teal. Error bars show SEM from three  
 10 independent biological experiments, each conducted in duplicate. Error bars smaller than symbols  
 11 are not shown.

12 **D)** Reciprocal of  $k_1'$  as a function of PCP length (same data as in panel C) – i.e. the time constant  
 13 for that steps – for the length variants.

14 **E)** The concentration dependence of length variants. Secondary data from import assays with  
 15 varying concentrations of length series proteins (4-6 independent biological replicates) were fitted  
 16 to the Michaelis-Menten equation, from which apparent  $K_{ds}$  and  $K_{MS}$  are derived. Error represents  
 17 the SEM of this fitting.

18 **F)** As in panel F but with the position variant proteins.

19

Figure 4.

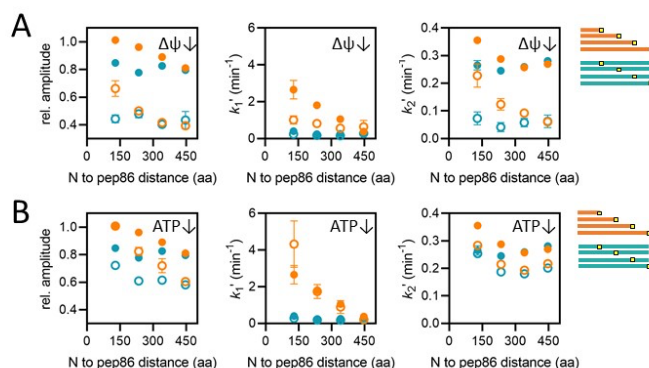

1  
2 **Figure 4: Effects of energy depletion on import of the length and position variants**  
3 **A)** Import in the presence (solid circles) or absence (open circles) of  $\Delta\psi$ , for the length (orange)  
4 and position (teal) series. Depletion of  $\Delta\psi$  was achieved by a 5 min pre-treatment of mitochondria  
5 with 10 nM valinomycin. Plots show amplitude (left),  $k_1'$  (middle) and  $k_2'$  (right) extracted from  
6 two-step fits to import traces as a function of PCP length or pep86 position. Each point is the  
7 average and SEM of three independent biological replicates.  
8 **B)** As in panel A, but without (solid circles) or with (open circles) ATP depletion instead of  
9 valinomycin. Matrix ATP was depleted by excluding ATP and its regenerating system from the  
10 assay mix (see results section for full description).  
11



Figure 5.

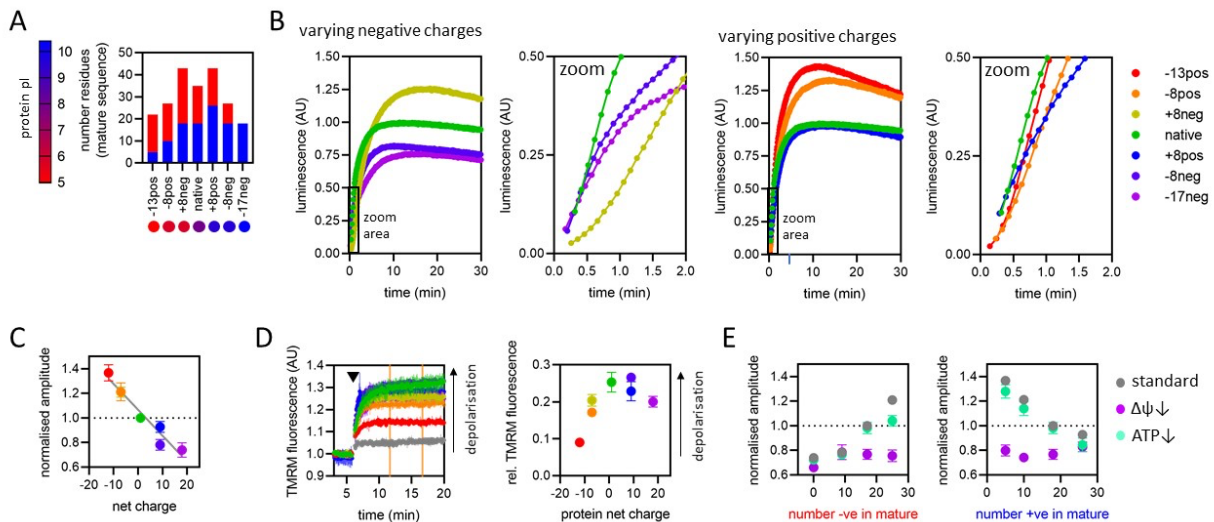

1 **Figure 5: The effect of PCP charge on import kinetics**

2 **A)** Overview of the charge variant protein series, showing numbers of positively (blue) and  
 3 negatively (red) charged residues in the mature part of each protein, and symbols for each protein  
 4 with colours corresponding to theoretical pI, according to the scale shown on the left. All proteins  
 5 in the charge variant series have the same length (203 amino acids), and are based on the N-  
 6 terminal section of yeast cytochrome *b*<sub>2</sub> lacking the stop-transfer signal ( $\Delta$ 43-65) to enable  
 7 complete matrix import (Gold et al., 2014).

8 **B)** Import traces for the charge variant proteins in which the number of negative (left) and positive  
 9 (right) charges are varied, normalised to the native PCP, coloured by rainbow from most negative  
 10 (red) to most positive (violet). Data shown are a single representative trace; this is because starting  
 11 points for each data set are slightly offset due to the injection time of the plate reader. Full data –  
 12 three biological replicates each performed in duplicate – are shown in **Figure 5 – figure supplement**  
 13 **1**.

14 **C)** Amplitudes obtained from panel (B) as a function of net charge (coloured as in panel B), with  
 15 a line of best fit shown. The data point for the +8neg protein (yellow) is in the same position as  
 16 the -8pos protein (orange) and is mostly hidden.

17 **D)** TMRM fluorescence over time in isolated yeast mitochondria (left), with PCPs added at the  
 18 time indicated by arrowhead. A no protein control (buffer only) is shown in grey, and the

1 remaining traces are shown with the PCP coloured as in panel B. Average TMRM fluorescence  
2 over a 5 minute window (between orange vertical lines) was calculated for each trace then plotted,  
3 relative to no protein control, against protein net charge (right). Data shown is mean  $\pm$  SD from  
4 three biological repeats.

5 **E)** Amplitude (normalised to the native PCP in standard conditions) of import signal for the charge  
6 variants, where numbers of negatively (left) or positively (right) charged residues is varied, under  
7 standard reaction conditions (grey) or when  $\Delta\psi$  (purple) or ATP (green) is depleted. Each data  
8 point is the mean  $\pm$  SEM from three biological repeats (shown in [Figure 5 – figure supplement](#)  
9 [1B-C](#)). Error bars smaller than symbols are not shown.

10

11

Figure 6.

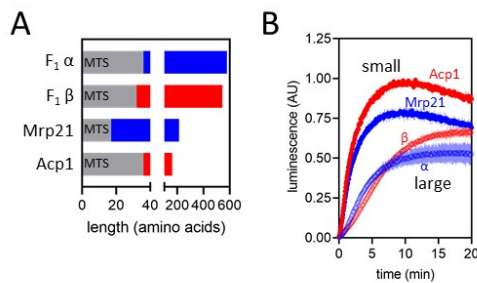

12 **Figure 6: Import of pep86 fused native precursors**

13 **A)** Schematic representation of the four native PCPs chosen: F<sub>1</sub> $\alpha$  (long, positively charged,  
14 predicted pI of mature part is 6.98), F<sub>1</sub> $\beta$  (long, negatively charged, predicted pI of mature part is  
15 5.43), Mrp21 (short, positively charged, predicted pI of mature part is 10.00) and Acp1 (short,  
16 negatively charged, predicted pI of mature part is 4.87).

17 **B)** Import traces for the four PCPs in panel A under standard conditions (1  $\mu$ M PCP), normalised  
18 to Acp1. Each trace is the mean  $\pm$  SD of three biological repeats.

19

## Figure 1 – figure supplement 1

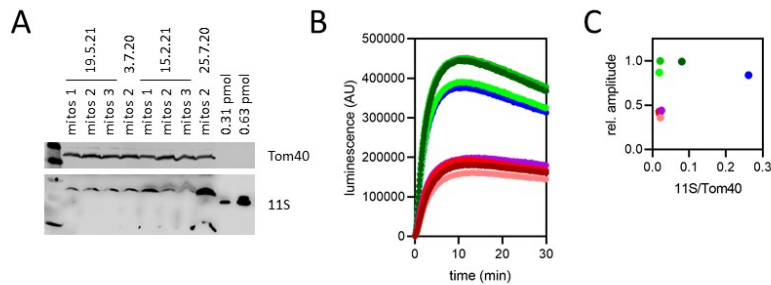

1  
2 **Figure 1 – figure supplement 1: 11S levels and signal amplitude**  
3 **A)** Western blot against 11S (bottom) and TOM40 (control, top) of eight different mitochondrial  
4 preparations extracted from four different batches of yeast. 60  $\mu$ g each sample of mitochondria  
5 was fractionated by SDS-PAGE prior to Western blot. Two known concentrations of purified his-  
6 tagged 11S are also included for quantification by densitometry. Matrix concentration of 11S was  
7 calculated using the previously published yeast mitochondrial matrix volume of  $1.62 \pm 0.3 \mu\text{l}/\text{mg}$   
8 (Koshkin and Greenberg, 2002).  
9 **B)** Import traces of Acp1-pep86 with each of the mitochondrial preps in panel A, performed in  
10 parallel and unnormalised.  
11 **C)** Signal amplitude from panel B as a function of 11S concentration (normalised to TOM40) from  
12 panel A, with points coloured as in panel B. The results show no correlation between 11S  
13 concentration and amplitude.  
14

## Figure 1 – figure supplement 2

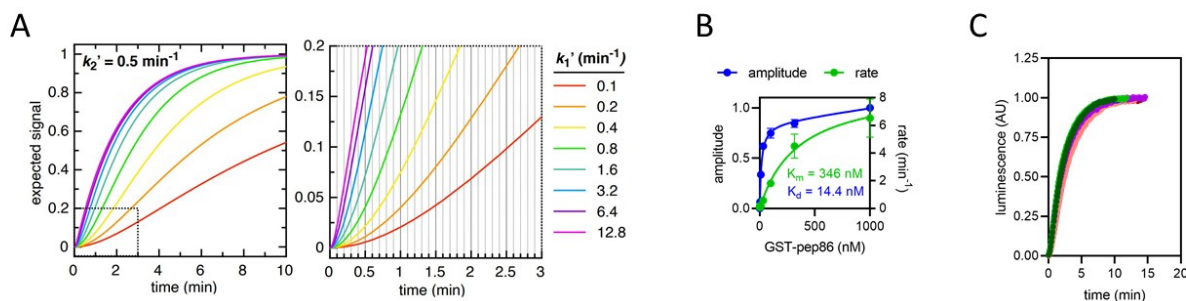

1  
2 **Figure 1 – figure supplement 2: Constraints of data fitting to the NanoLuc import traces.**  
3 **A)** The expected signal for a two-step import process, with  $k_2'$  fixed at  $0.5 \text{ min}^{-1}$  (for illustrative  
4 purposes) and  $k_1'$  varied between  $0.1 \text{ min}^{-1}$  (red) and  $12.8 \text{ min}^{-1}$  (magenta). As  $k_1'$  increases, it  
5 makes increasingly less difference to the overall shape of the curve. Because the plate reader  
6 measures luminescence with a frequency of  $10 \text{ min}^{-1}$  (represented as vertical gridlines in the  
7 zoomed in panel, right), any rate constants faster than about  $5 \text{ min}^{-1}$  will not be resolved. The same  
8 effect holds true for any additional rates that form part of the mechanism but are faster than  $\sim 5$   
9  $\text{min}^{-1}$ .  
10 **B)** Amplitude (blue) and rate (green) determined from a single exponential fits to NanoLuc  
11 formation is solution. The pep86 tag is provided in the form of GST-pep86 which is not a PCP,  
12 and 11S comes from mitochondria solubilised completely with digitonin ( $5 \text{ mg/ml}$ ) to simulate  
13 binding within the mitochondrial matrix. Fits are to the Michaelis Menten equation giving an  
14 affinity of  $14.4 \text{ nM}$  and a  $v_{\text{max}}$  of  $8.9 \text{ min}^{-1}$ . Data is shown as mean $\pm$ SD of two independent  
15 biological experiments.  
16 **C)** The import traces in [Figure 1 – figure supplement 1B](#) all normalised to 1, coloured in the same  
17 way. For each trace, data collected at times after the maximum luminescence was recorded were  
18 excluded. The fact that all the traces overlay well confirms that binding of 11S is too fast to  
19 constitute either of the rates extracted from the two step fits – as expected given that the binding  
20 rate should be close to  $v_{\text{max}}$  for NanoLuc formation (as determined in panel **B**).

21

## Figure 3 – figure supplement 1

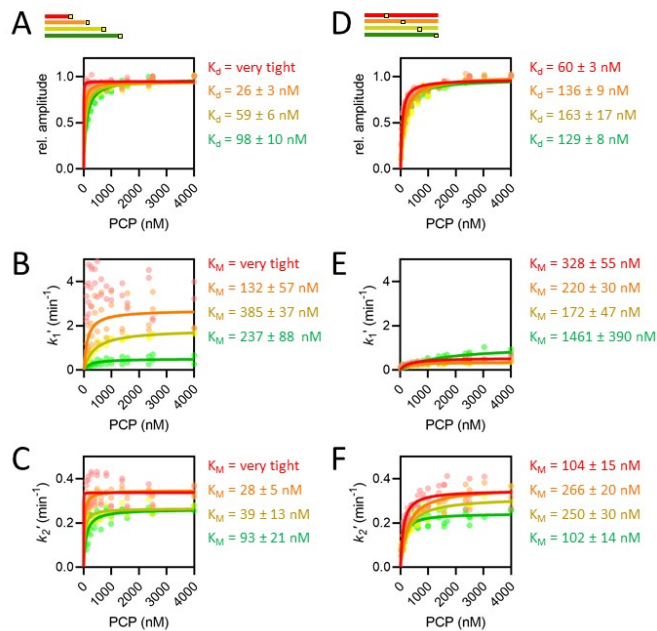

1

2 **Figure 3 – figure supplement 1: The concentration dependence of length and position**  
 3 **variants**

4 **A-F)** Amplitudes (**A, D**),  $k_1'$ , assigned as the faster rate (**B, E**) and  $k_2'$  (**C, F**) for the length (**A-C**)  
 5 and position (**D-F**) series, coloured red, orange, yellow and green in order of increasing length or  
 6 pep86 position. All individual fits from 4-6 independent biological replicates of each set are  
 7 shown, and the secondary data are fitted to the Michaelis-Menten equation, with errors estimated  
 8 from the fitting.

9

## Figure 4 – figure supplement 1

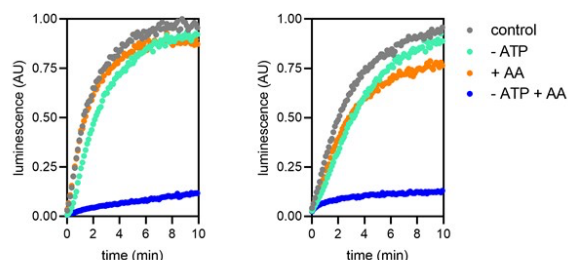

1  
2 **Figure 4 – figure supplement 1: Confirmation of ATP depletion in the mitochondrial matrix.**

3 Import traces for 1  $\mu$ M Acp1-pep86 (left) and Mrp21-pep86 (right) in the presence (grey and  
4 orange symbols) or absence (turquoise and blue symbols) of ATP and its regenerating system, and  
5 the absence (grey and turquoise) or presence (orange and blue) of antimycin A (AA).

6  
7

## Figure 5 – figure supplement 1

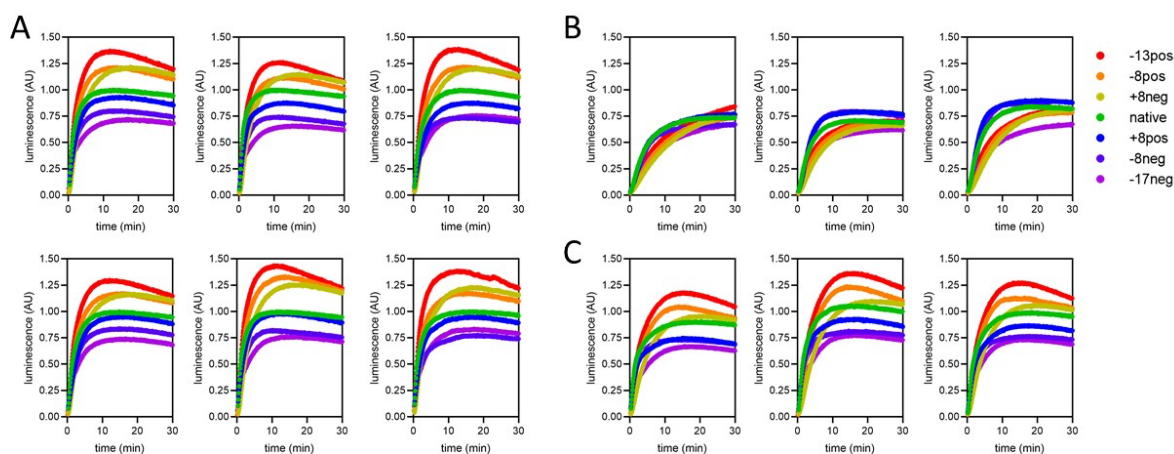

8  
9 **Figure 5 – figure supplement 1: Complete import traces for the data in Figure 5.**

10 **A)** Two technical repeats each of three biological replicates, under standard conditions (1  $\mu$ M PCP,  
11 ATP and regenerating system present and valinomycin absent).

12 **B)** Three biological replicates with  $\Delta\psi$  depletion (achieved by 5 min pre-treatment of mitochondria  
13 with 10 nM valinomycin).

14 **C)** Three biological replicates with ATP depletion (achieved by excluding ATP and its  
15 regenerating system from the assay buffer)

16

1 Supplementary Table 1.

his tag  
 myc tag  
 v5 tag  
 pep86 “L”  
 scrambled pep86 “D”  
*S. cerevisiae* mature Acp1  
*S. cerevisiae* Acp1 presequence  
*M. musculus* DHFR  
*N. crassa* Su9 1-69  
*S. cerevisiae* cyt *b*<sub>2</sub> 1-191 Δ43-65

| PCP name           | Amino acid sequence                                                                                                                                                                                                                                                                                                                                                                                                                                                                                                                                                                                                                           | Expression vector |
|--------------------|-----------------------------------------------------------------------------------------------------------------------------------------------------------------------------------------------------------------------------------------------------------------------------------------------------------------------------------------------------------------------------------------------------------------------------------------------------------------------------------------------------------------------------------------------------------------------------------------------------------------------------------------------|-------------------|
| PCP-DHFR-pep86     | MASTRVLASRLASQMAASAKVARPAVRVAQVSKRTI<br>QTGSPLQTLKRTQMTSIVNATTRQAFQKRAYSSSANL<br>SKDQVSQRVIDVIKAFDKNSPNIANKQISSDTQFHKDL<br>GLDSLDTVELLVAIEEEFDIEIPDKVADELRSVGETVD<br>YIASNPDANGSGVSWGLRKF <del>KIS</del> GSGSANLSKDQVSQ<br>RVIDVIKAFDKNSPNIANKQISSDTQFHKDLGLDSLDT<br>VELLVAIEEEFDIEIPDKVADELRSVGETVDYIASNPDA<br>NGS <del>G</del> VSWGLRKF <del>KIS</del> VRPLNSIVAVSQNMGIGKNGDL<br>PWPPLRNEFKYFQRM <del>TTTSS</del> VEGKQNLVIMGRK <del>TF</del><br>SIPEKNRPLKDRINIVLSRELKEPPRGAHFLAKSLDDAL<br>RLIEQPELASKVDMVWIVGGSSVYQEAMNQPGHLRL<br>FVTRIMQEFESDTFFPEIDLGKYKLLPEYPGVLSEVQE<br>EKG <del>IKYKFEVYEK</del> DFEAYVEQKLISEEDLNSAVVSG<br>WRLFKKIS | pE-SUMOpro        |
| PCP-pep86-DHFR     | MASTRVLASRLASQMAASAKVARPAVRVAQVSKRTI<br>QTGSPLQTLKRTQMTSIVNATTRQAFQKRAYSSSANL<br>SKDQVSQRVIDVIKAFDKNSPNIANKQISSDTQFHKDL<br>GLDSLDTVELLVAIEEEFDIEIPDKVADELRSVGETVD<br>YIASNPDANGSGVSGWRLFKKISGSGSANLSKDQVSQ<br>RVIDVIKAFDKNSPNIANKQISSDTQFHKDLGLDSLDT<br>VELLVAIEEEFDIEIPDKVADELRSVGETVDYIASNPDA<br>NGS <del>G</del> VSWGLRKF <del>KIS</del> VRPLNSIVAVSQNMGIGKNGDL<br>PWPPLRNEFKYFQRM <del>TTTSS</del> VEGKQNLVIMGRK <del>TF</del><br>SIPEKNRPLKDRINIVLSRELKEPPRGAHFLAKSLDDAL<br>RLIEQPELASKVDMVWIVGGSSVYQEAMNQPGHLRL<br>FVTRIMQEFESDTFFPEIDLGKYKLLPEYPGVLSEVQE<br>EKG <del>IKYKFEVYEK</del> DFEAYVEQKLISEEDLNSAVC                            | pE-SUMOpro        |
| L (also PCP-pep86) | MVFRSVCRISRVAPSA <del>YRTIMGRSVMSNTILAQR</del> FYS<br>ANLSKDQVSQRVIDVIKAFDKNSPNIANKQISSDTQFH<br>KDLGLDSLDTVELLVAIEEEFDIEIPDKVADELRSVGE<br>TVDYIASNPDANGSGVSGWRLFKKISGSGEQKLISEED<br>LGGHHHHHHH                                                                                                                                                                                                                                                                                                                                                                                                                                                | pRSFDuet          |

|      |                                                                                                                                                                                                                                                                                                                                                                                                                                                                                                                                                    |          |
|------|----------------------------------------------------------------------------------------------------------------------------------------------------------------------------------------------------------------------------------------------------------------------------------------------------------------------------------------------------------------------------------------------------------------------------------------------------------------------------------------------------------------------------------------------------|----------|
| DL   | MVFRSVCRISRRVAPSA YRTIMGRSVMSNTILAQRFYSA<br>ANLSKDQVSQRVIDVIKAFDKNSPNIANKQISSDTQFH<br>KDLGLDSLDTVELLVAIEEEFDIEIPDKVADELRSVGE<br>TVDYIASNPDANGSGVSWGLRKFKISGSGSANLSKDQ<br>VSQRVIDVIKAFDKNSPNIANKQISSDTQFHKDLGLDS<br>LDTVELLVAIEEEFDIEIPDKVADELRSVGETVDYIASN<br>PDANGSGVSGWRLFKKISGSGEQKLISEEDLGGHHHH<br>HH                                                                                                                                                                                                                                          | pRSFDuet |
| DDL  | MVFRSVCRISRRVAPSA YRTIMGRSVMSNTILAQRFYSA<br>ANLSKDQVSQRVIDVIKAFDKNSPNIANKQISSDTQFH<br>KDLGLDSLDTVELLVAIEEEFDIEIPDKVADELRSVGE<br>TVDYIASNPDANGSGVSWGLRKFKISGSGSANLSKDQ<br>VSQRVIDVIKAFDKNSPNIANKQISSDTQFHKDLGLDS<br>LDTVELLVAIEEEFDIEIPDKVADELRSVGETVDYIASN<br>PDANGSGVSWGLRKFKISGSGSANLSKDQVSQRVIDV<br>IKAFDKNSPNIANKQISSDTQFHKDLGLDSLDTVELLVA<br>AIEEEFDIEIPDKVADELRSVGETVDYIASNPDANGSG<br>VSGWRLFKKISGSGEQKLISEEDLGGHHHHHH                                                                                                                       | pRSFDuet |
| DDDL | MVFRSVCRISRRVAPSA YRTIMGRSVMSNTILAQRFYSA<br>ANLSKDQVSQRVIDVIKAFDKNSPNIANKQISSDTQFH<br>KDLGLDSLDTVELLVAIEEEFDIEIPDKVADELRSVGE<br>TVDYIASNPDANGSGVSWGLRKFKISGSGSANLSKDQ<br>VSQRVIDVIKAFDKNSPNIANKQISSDTQFHKDLGLDS<br>LDTVELLVAIEEEFDIEIPDKVADELRSVGETVDYIASN<br>PDANGSGVSWGLRKFKISGSGSANLSKDQVSQRVIDV<br>IKAFDKNSPNIANKQISSDTQFHKDLGLDSLDTVELLVA<br>AIEEEFDIEIPDKVADELRSVGETVDYIASNPDANGSG<br>VSWGLRKFKISGSGSANLSKDQVSQRVIDVIKAFDKN<br>SPNIANKQISSDTQFHKDLGLDSLDTVELLVAIEEEFDI<br>EIPDKVADELRSVGETVDYIASNPDANGSGVSGWRLF<br>KKISGSGEQKLISEEDLGGHHHHHH | pRSFDuet |
| LDDD | MVFRSVCRISRRVAPSA YRTIMGRSVMSNTILAQRFYSA<br>ANLSKDQVSQRVIDVIKAFDKNSPNIANKQISSDTQFH<br>KDLGLDSLDTVELLVAIEEEFDIEIPDKVADELRSVGE<br>TVDYIASNPDANGSGVSGWRLFKKISGSGSANLSKDQ<br>VSQRVIDVIKAFDKNSPNIANKQISSDTQFHKDLGLDS<br>LDTVELLVAIEEEFDIEIPDKVADELRSVGETVDYIASN<br>PDANGSGVSWGLRKFKISGSGSANLSKDQVSQRVIDV<br>IKAFDKNSPNIANKQISSDTQFHKDLGLDSLDTVELLVA<br>AIEEEFDIEIPDKVADELRSVGETVDYIASNPDANGSG<br>VSWGLRKFKISGSGSANLSKDQVSQRVIDVIKAFDKN<br>SPNIANKQISSDTQFHKDLGLDSLDTVELLVAIEEEFDI<br>EIPDKVADELRSVGETVDYIASNPDANGSGVSWGLRK<br>FKISGSGEQKLISEEDLGGHHHHHH | pRSFDuet |
| DLDD | MVFRSVCRISRRVAPSA YRTIMGRSVMSNTILAQRFYSA<br>ANLSKDQVSQRVIDVIKAFDKNSPNIANKQISSDTQFH                                                                                                                                                                                                                                                                                                                                                                                                                                                                 | pRSFDuet |



|        |                                                                                                                                                                                                                                                                                                                                                                                                                            |          |
|--------|----------------------------------------------------------------------------------------------------------------------------------------------------------------------------------------------------------------------------------------------------------------------------------------------------------------------------------------------------------------------------------------------------------------------------|----------|
|        | <p>KDLGLDSLDTVELLVAIEEEFDIEIPDKVADELRSVGETVDYIASNPDANGSGVSWGLRKFKISGSGSANLSKDQVSQRVIDVIKAFDKNSPNIANKQISSDTQFHKDLGLDSLDTVELLVAIEEEFDIEIPDKVADELRSVGETVDYIASNPDANGSGVSWGLRKFKISGSGSANLSKDQVSQRVIDVIKAFDKNSPNIANKQISSDTQFHKDLGLDSLDTVELLVAIEEEFDIEIPDKVADELRSVGETVDYIASNPDANGSGVSWGLRKFKISGSGSANLSKDQVSQRVIDVIKAFDKNSPNIANKQISSDTQFHKDLGLDSLDTVELLVAIEEEFDIEIPDKVADELRSVGETVDYIASNPDANGSGVSWGLRKFKISGSGEOKLISEEDLGGHHHHHH</p> |          |
| DDL    | <p>MVFRSVCRISSRVAPSA YRTIMGRSVMNTILAQRFYSANLSKDQVSQRVIDVIKAFDKNSPNIANKQISSDTQFHKDLGLDSLDTVELLVAIEEEFDIEIPDKVADELRSVGETVDYIASNPDANGSGVSWGLRKFKISGSGSANLSKDQVSQRVIDVIKAFDKNSPNIANKQISSDTQFHKDLGLDSLDTVELLVAIEEEFDIEIPDKVADELRSVGETVDYIASNPDANGSGVSGWRLFKKISGSGSANLSKDQVSQRVIDVIKAFDKNSPNIANKQISSDTQFHKDLGLDSLDTVELLVAIEEEFDIEIPDKVADELRSVGETVDYIASNPDANGSGVSWGLRKFKISGSGEOKLISEEDLGGHHHHHH</p>                               | pRSFDuet |
| -13pos | <p>MVKYKPLLKISKNSEAAILRASKTRLNTIRAYGSTVPKSKSFSSVAYLNWHNGQIDNEPQLDMNQGGIPNPLLGLGGPAEVAQHNQPDCCWVINGYVYDLTQFLPNHPGGQDVIQFNAGQDVTAIFEPLHAPNVIDQYIAPEQQLGPLQGSMPPELVCPPYAPGETQEDIAQQEQGTLQHSHHHHHHSGGGGSVSGWRLFKKIS</p>                                                                                                                                                                                                        | pBAD     |
| -8pos  | <p>MVKYKPLLKISKNSEAAILRASKTRLNTIRAYGSTVPKSKSFSSVAYLNWHNGQIDNEPQLDMNQGGIPNPLLGLGGPAEVAQHNPDDCWVINGYVYDLTQFLPNHPGGQDVIQFNAGKDVTAIFEPLHAPNVIDQYIAPEKKGPLQGSMPPELVCPPYAPGETQEDIAQKEQGTLQHSHHHHHHSGGGGSVSGWRLFKKIS</p>                                                                                                                                                                                                          | pRSFDuet |
| +8neg  | <p>MVKYKPLLKISKNSEAAILRASKTRLNTIRAYGSTVPKSKSFSSVAYLNWHNGQIDNEPKLDMDKGGIPNPLLGLGGPAEVAKHDKPDCCWVIDGYVYDLTRFLPDHPGGQDVIKFDAGKDVTAIFEPLHAPDVIDKYIAPEKKGPLEGSMPPPELVCPPYAPGETKEDIARKEEGTLQHSHHHHHHSGGGGSVSGWRLFKKIS</p>                                                                                                                                                                                                        | pRSFDuet |
| Native | <p>MVKYKPLLKISKNSEAAILRASKTRLNTIRAYGSTVPKSKSFSSVAYLNWHNGQIDNEPKLDMNKGGIPNPLLGLGGPAEVAKHNPDDCWVINGYVYDLTRFLPNHPGGQDVIKFNAGKDVTAIFEPLHAPNVIDKYIAPEKKGPL</p>                                                                                                                                                                                                                                                                  | pBAD     |

|                  |                                                                                                                                                                                                                                                                                                                                                                                                                                                                                                                                                                                                                                                                 |          |
|------------------|-----------------------------------------------------------------------------------------------------------------------------------------------------------------------------------------------------------------------------------------------------------------------------------------------------------------------------------------------------------------------------------------------------------------------------------------------------------------------------------------------------------------------------------------------------------------------------------------------------------------------------------------------------------------|----------|
|                  | QGSMPPELVCPYPAPGETKEDIARKEQGTLOHHHHHH<br>SGGGGSVSGWRLFKKIS                                                                                                                                                                                                                                                                                                                                                                                                                                                                                                                                                                                                      |          |
| +8pos            | MVKYKPLLKISKNSEAAILRASKTRLNTIRAYGSTVPK<br>SKSFSSVAYLNWHNGQIDNEPKLDMKKGGIPNPLLGL<br>GGPAEVAKHNKPDCCWVVIKGYVYDLTRFLPKHPGG<br>RDVIKFKAGKDVTAIFEPLHAPKVIDKYIAPEKKLGPL<br>RGSMPPELVCPYPAPGETKEDIARKERGTLQHHHHHH<br>SGGGGSVSGWRLFKKIS                                                                                                                                                                                                                                                                                                                                                                                                                                 | pRSFDuet |
| -8neg            | MVKYKPLLKISKNSEAAILRASKTRLNTIRAYGSTVPK<br>SKSFSSVAYLNWHNGQIDNEPKLNMNKGIPNPLLGL<br>GGPAQVAKHNKPDCCWVINGYVYNLTRFLPNHPG<br>GQNVIKFNAGKDVTAIFQPLHAPNVIDKYIAPQKKLG<br>PLQGSMPPLQVCPYPAPGQTKEDIARKEQGTLOHHHH<br>HHSGGGGSVSGWRLFKKIS                                                                                                                                                                                                                                                                                                                                                                                                                                   | pBAD     |
| -17neg           | MVKYKPLLKISKNSEAAILRASKTRLNTIRAYGSTVPK<br>SKSFSSVAYLNWHNGQINNQPKNMKNKGIPNPLLGL<br>GGPAQVAKHNKPNNCWVINGYVYNLTRFLPNHPG<br>GQNVIKFNAGKNVTAIFQPLHAPNVINKYIAPQKKLG<br>PLQGSMPPLQVCPYPAPGQTKQNIARKQQGTLOHHH<br>HHHSGGGGSVSGWRLFKKIS                                                                                                                                                                                                                                                                                                                                                                                                                                   | pBAD     |
| F <sub>1</sub> α | MVLARTAAIRSLRSTLINSTKAARPAALASTRRLAS<br>TKAQPTVSSILEERIKGVSDEANLNETGRVLA VGDGI<br>ARVFGLNNIQAEELVEFSSGVKGMALNLEPGQVGI VL<br>FGSDRLVKEGELVKRTGNIVDVPVGPGLLGRVVDAL<br>GNPIDGKGPIDAAGRSRAQVKAPGILPRRSVHEPVQT<br>GLKAVDALVPIGRGQRELIIGDRQTGKTAVALDILN<br>QKRWNNGSDESKKLYCVYVAVGQKRSTVAQLVQTL<br>EQHDAMKYSIIVAATASEAAPLQYLAPFTAASIGEF<br>RDNGKHALIVYDDLKQAVAYRQLSLLRRPPGRE<br>YPGDVFYLSRLLERAAKLSEKEGSGSLTALPVIE<br>TQGGDVSAYIPTNVISITDGGQIFLEAELFYKGI<br>RPAINVGLSVSRVGSAAQVKALKQVAGSLKLFLA<br>QYREVA AFAQFGSDL DASTKQTLVRGERLTQL<br>LKQNQYSPLATEEQVPLIYAGVNGHLDGIELSR<br>IGEFESSFLSYLKSNNHNE LLTEIREK GELSKEL<br>LASLKSATESFVATFGG <b>EQKLISEEDL</b> GG<br>GHHHHHH | pBAD     |
| F <sub>1</sub> β | MVLPRLYTATSRAAFKAAKQSAPLLSTSWKRCMASA<br>AQSTPITGKVTA VIGAIVDVHFEQSELPAILNALEIKTP<br>QGKLVLEVAQHLGENTVRTIAMDGTEGLVRGEKVLD<br>TGGPISVPVGRETLGRIINVIGEPIDERGPIKSKLRKPIH<br>ADPPSFAEQSTS AEILETGIVVDLLAPYARGGKIGLF<br>GGAGVGKTVFIQELINNIKAHGGFSVFTGVGERTRE<br>GNDLYREMKETG VINLEGESKVALVFGQMNEPPGAR<br>ARVALTGLTIAEYFRDEEGQDVLLFIDNIFRFTQAGSE<br>VSALLGRIPSAVGYQPTLATDMGLLQERITTTKKG<br>SVTSVQAVYVPADDLTD PAPATTF AHL DATTVLSRGISE                                                                                                                                                                                                                                  | pBAD     |

|       |                                                                                                                                                                                                                                                                                   |      |
|-------|-----------------------------------------------------------------------------------------------------------------------------------------------------------------------------------------------------------------------------------------------------------------------------------|------|
|       | <p>LGIYPAVDPLDSKSRLLDAAVVGQEHYDVASKVQET<br/> LQTYKSLQDIIAILGMDELSEQDKLTVERARKIQRFLS<br/> QPFAVAEVFTGIPGKLVRLKDTVASFKA VLEGKYDNI<br/> PEHAFYMVGGIEDVVAKA EKLA AEANGG <b>EQKLISEE</b><br/> <b>DLGGHHHHHGGVSGWRLFKKIS</b></p>                                                        |      |
| Mrp21 | <p>MVLKSTLRLSRISLRRGFTTIDCLRQONS DIDKIILNPIK<br/> LAQGSNSDRGQTSKSKTDNADILSMEIPV DMMQSAG<br/> RINKRELLSEAEIARSSVENAQMRFN S GKSIIVNKNNP<br/> AESFKRLNRIMFENNIPGDKRSQR FYMKPGKVAELKR<br/> SQRHRKEFMMGFKRLIEIVKDAKR KGY <b>EQKLISEEDL</b><br/> GG <b>HHHHHHHSGGGGSVSGWRLFKKIS</b></p> | pBAD |
| Acp1  | <p><b>MVFRSVCRISSRVAPSAYRTIMGRS VMSNTILAQRFYS</b><br/> <b>ANLSKDQVSQRVIDVIKAFDKNSPNIANKQISSDTQFH</b><br/> <b>KDLGLDSLDTVELLVAIEEEFDIEIPDKVADELRSVGE</b><br/> <b>TVDYIASNPDANEQKLISEEDLGGHHHHHSGGGGSV</b><br/> <b>SGWRLFKKIS</b></p>                                               | pBAD |

1
